# Supplementary material for: Unseen threats: negative effects of microplastic leachate on coral planulae settlement
Source: Frontiers journal article supplement (doi:10.3389/fmars.2025.1596594), 2025-07-24
Supplement: Table_2.xlsx [file Table_2.xlsx]

## Sheet: Metadata
Table Legends
Table S2: Montipora capitata survival analysis a) model summary results and b) post-hoc analysis comparing treatments on each day of the experiment. This model was a generalized linear mixed model with a beta distribution and a logit link function. Fixed effects included treatment, day and their interaction, with a random effect of replicate. The results are presented on the log odds scale with p…
Table S3: Harbor Porites June survival analysis a) model summary results and b) post-hoc analysis comparing treatments on each day of the experiment. This model was a generalized linear mixed model with a beta distribution and a logit link function. Fixed effects included treatment, day and their interaction, with a random effect of replicate. The results are presented on the log odds scale with …
Table S4: Harbor Porites September survival analysis a) model summary results and b) post-hoc analysis comparing treatments on each day of the experiment. This model was a generalized linear mixed model with a beta distribution and a logit link function. Fixed effects included treatment, day and their interaction. Replicates were modeled with random slopes for day to account for variability betwe…
Table S5: Montipora capitata June settlement analysis a) model summary results and b) post-hoc analysis comparing treatments on each day of the experiment. This model was a generalized linear mixed model with a beta distribution and a logit link function. Fixed effects included treatment, day and their interaction, with a random effect of replicate. The results are presented on the log odds scale…
Table S6: Harbor Porites June settlement analysis a) model summary results and b) post-hoc analysis comparing treatments on each day of the experiment. This model was a generalized linear mixed model with a beta distribution and a logit link function. Fixed effects included treatment, day and their interaction. The results are presented on the log odds scale with a p-values adjusted using the Tuk…
Table S7: Harbor Porites September settlement analysis a) model summary results and b) post-hoc analysis comparing treatments on each day of the experiment. This model was a generalized linear mixed model with a beta distribution and a logit link function. Fixed effects included treatment, day and their interaction. The results are presented on the log odds scale with a p-values adjusted using th…

## Sheet: Table S2a
Comparison	Estimate	Std. Error	z value	p-value
(Intercept)	3.64655	0.551579	6.611	3.81e-11
Control - Leachate	-0.038494	0.797549	-0.048	0.9615
HDPE - 50	0.88612	0.807856	1.097	0.2727
HDPE - 100	-0.000361	0.754712	0	0.9996
HDPE - 200	0.227972	0.80477	0.283	0.777
LDPE - 50	-0.039805	0.788421	-0.05	0.9597
LDPE - 100	0.832696	0.794181	1.048	0.2944
LDPE - 200	-0.152262	0.789814	-0.193	0.8471
Nylon - 50	0.075354	0.782039	0.096	0.9232
Nylon - 100	0.595999	0.821524	0.725	0.4682
Nylon - 200	0.791274	0.830411	0.953	0.3407
PP - 50	0.152136	0.77513	0.196	0.8444
PP - 100	-0.291689	0.754893	-0.386	0.6992
PP - 200	-0.174369	0.773027	-0.226	0.8215
Day	-0.762999	0.173575	-4.396	1.1e-05
Control - Leachate : Day	0.032703	0.267393	0.122	0.9027
HDPE 50 : Day	-0.390967	0.251174	-1.557	0.1196
HDPE - 100 : Day	-0.032446	0.236869	-0.137	0.891
HDPE - 200 : Day	-0.015468	0.257802	-0.06	0.9522
LDPE - 50 : Day	0.205923	0.243176	0.847	0.3971
LDPE - 100 : Day	-0.384248	0.24475	-1.57	0.1164
LDPE - 200 : Day	0.185855	0.253682	0.733	0.4638
Nylon - 50 : Day	-0.050312	0.255095	-0.197	0.8436
Nylon - 100 : Day	-0.366384	0.277729	-1.319	0.1871
Nylon - 200 : Day	-0.487959	0.279881	-1.743	0.0813
PP - 50 : Day	-0.05985	0.24487	-0.244	0.8069
PP - 100 : Day	0.178452	0.240029	0.743	0.4572
PP - 200 : Day	0.113942	0.250658	0.455	0.6494

## Sheet: Table S2b
Day	Contrasts	Estimate	SE	z ratio	p-value		Day.of.experiment = 0:
0	(Control-Fresh) - (Control-Leachate)	0.00992	0.421	0.024	1		contrast	estimate	SE	z.ratio	p.value
	(Control-Fresh) - (HDPE-100)	0.20245	0.42	0.482	1		(Control-Fresh) - (Control-Leachate)	0.038494	0.798	0.048	1
	(Control-Fresh) - (HDPE-200)	-0.06241	0.416	-0.15	1		(Control-Fresh) - (HDPE-100)	-0.88612	0.808	-1.097	0.9983
	(Control-Fresh) - (HDPE-50)	-0.22961	0.463	-0.496	1		(Control-Fresh) - (HDPE-200)	0.000361	0.755	0	1
	(Control-Fresh) - (LDPE-100)	0.31951	0.411	0.778	1		(Control-Fresh) - (HDPE-50)	-0.227972	0.805	-0.283	1
	(Control-Fresh) - (LDPE-200)	-0.08982	0.418	-0.215	1		(Control-Fresh) - (LDPE-100)	0.039805	0.788	0.05	1
	(Control-Fresh) - (LDPE-50)	0.25831	0.439	0.588	1		(Control-Fresh) - (LDPE-200)	-0.832696	0.794	-1.048	0.9989
	(Control-Fresh) - (Nylon-100)	0.11341	0.421	0.269	1		(Control-Fresh) - (LDPE-50)	0.152262	0.79	0.193	1
	(Control-Fresh) - (Nylon-200)	0.04021	0.383	0.105	1		(Control-Fresh) - (Nylon-100)	-0.075354	0.782	-0.096	1
	(Control-Fresh) - (Nylon-50)	-0.01255	0.373	-0.034	1		(Control-Fresh) - (Nylon-200)	-0.595999	0.822	-0.725	1
	(Control-Fresh) - (PP-100)	0.06131	0.399	0.154	1		(Control-Fresh) - (Nylon-50)	-0.791274	0.83	-0.953	0.9996
	(Control-Fresh) - (PP-200)	0.15416	0.428	0.36	1		(Control-Fresh) - (PP-100)	-0.152136	0.775	-0.196	1
	(Control-Fresh) - (PP-50)	0.1266	0.397	0.319	1		(Control-Fresh) - (PP-200)	0.291689	0.755	0.386	1
	(Control-Leachate) - (HDPE-100)	0.19253	0.457	0.421	1		(Control-Fresh) - (PP-50)	0.174369	0.773	0.226	1
	(Control-Leachate) - (HDPE-200)	-0.07234	0.454	-0.159	1		(Control-Leachate) - (HDPE-100)	-0.924614	0.837	-1.104	0.9981
	(Control-Leachate) - (HDPE-50)	-0.23954	0.497	-0.482	1		(Control-Leachate) - (HDPE-200)	-0.038133	0.786	-0.049	1
	(Control-Leachate) - (LDPE-100)	0.30958	0.45	0.688	1		(Control-Leachate) - (HDPE-50)	-0.266466	0.834	-0.319	1
	(Control-Leachate) - (LDPE-200)	-0.09974	0.455	-0.219	1		(Control-Leachate) - (LDPE-100)	0.001311	0.818	0.002	1
	(Control-Leachate) - (LDPE-50)	0.24838	0.474	0.524	1		(Control-Leachate) - (LDPE-200)	-0.87119	0.824	-1.057	0.9988
	(Control-Leachate) - (Nylon-100)	0.10349	0.46	0.225	1		(Control-Leachate) - (LDPE-50)	0.113768	0.82	0.139	1
	(Control-Leachate) - (Nylon-200)	0.03029	0.428	0.071	1		(Control-Leachate) - (Nylon-100)	-0.113848	0.812	-0.14	1
	(Control-Leachate) - (Nylon-50)	-0.02248	0.42	-0.054	1		(Control-Leachate) - (Nylon-200)	-0.634493	0.85	-0.746	1
	(Control-Leachate) - (PP-100)	0.05138	0.439	0.117	1		(Control-Leachate) - (Nylon-50)	-0.829768	0.859	-0.966	0.9995
	(Control-Leachate) - (PP-200)	0.14424	0.467	0.309	1		(Control-Leachate) - (PP-100)	-0.19063	0.806	-0.237	1
	(Control-Leachate) - (PP-50)	0.11668	0.439	0.266	1		(Control-Leachate) - (PP-200)	0.253195	0.786	0.322	1
	(HDPE-100) - (HDPE-200)	-0.26486	0.452	-0.585	1		(Control-Leachate) - (PP-50)	0.135875	0.803	0.169	1
	(HDPE-100) - (HDPE-50)	-0.43206	0.495	-0.873	0.9999		(HDPE-100) - (HDPE-200)	0.886481	0.796	1.113	0.998
	(HDPE-100) - (LDPE-100)	0.11706	0.448	0.261	1		(HDPE-100) - (HDPE-50)	0.658148	0.843	0.781	1
	(HDPE-100) - (Nylon-100)	-0.08904	0.458	-0.194	1		(HDPE-100) - (LDPE-100)	0.925926	0.828	1.119	0.9979
	(HDPE-100) - (PP-100)	-0.14114	0.438	-0.322	1		(HDPE-100) - (LDPE-200)	0.053424	0.831	0.064	1
	(HDPE-200) - (HDPE-50)	-0.1672	0.491	-0.341	1		(HDPE-100) - (LDPE-50)	1.03838	0.83	1.252	0.9936
	(HDPE-200) - (LDPE-200)	-0.0274	0.451	-0.061	1		(HDPE-100) - (Nylon-100)	0.810766	0.822	0.986	0.9994
	(HDPE-200) - (Nylon-200)	0.10262	0.422	0.243	1		(HDPE-100) - (Nylon-200)	0.290121	0.858	0.338	1
	(HDPE-200) - (PP-200)	0.21657	0.46	0.47	1		(HDPE-100) - (Nylon-50)	0.094847	0.865	0.11	1
	(HDPE-50) - (LDPE-50)	0.48792	0.509	0.958	0.9996		(HDPE-100) - (PP-100)	0.733984	0.815	0.9	0.9998
	(HDPE-50) - (Nylon-50)	0.21706	0.461	0.471	1		(HDPE-100) - (PP-200)	1.17781	0.797	1.477	0.9718
	(HDPE-50) - (PP-50)	0.35622	0.478	0.746	1		(HDPE-100) - (PP-50)	1.06049	0.814	1.303	0.9907
	(LDPE-100) - (LDPE-200)	-0.40932	0.447	-0.916	0.9997		(HDPE-200) - (HDPE-50)	-0.228333	0.793	-0.288	1
	(LDPE-100) - (LDPE-50)	-0.0612	0.464	-0.132	1		(HDPE-200) - (LDPE-100)	0.039444	0.777	0.051	1
	(LDPE-100) - (Nylon-100)	-0.20609	0.45	-0.458	1		(HDPE-200) - (LDPE-200)	-0.833057	0.783	-1.065	0.9987
	(LDPE-100) - (PP-100)	-0.2582	0.43	-0.6	1		(HDPE-200) - (LDPE-50)	0.151901	0.778	0.195	1
	(LDPE-200) - (LDPE-50)	0.34812	0.471	0.739	1		(HDPE-200) - (Nylon-100)	-0.075715	0.77	-0.098	1
	(LDPE-200) - (Nylon-200)	0.13002	0.425	0.306	1		(HDPE-200) - (Nylon-200)	-0.59636	0.81	-0.736	1
	(LDPE-200) - (PP-200)	0.24397	0.464	0.526	1		(HDPE-200) - (Nylon-50)	-0.791635	0.819	-0.966	0.9995
	(LDPE-50) - (Nylon-50)	-0.27086	0.437	-0.619	1		(HDPE-200) - (PP-100)	-0.152497	0.763	-0.2	1
	(LDPE-50) - (PP-50)	-0.1317	0.455	-0.29	1		(HDPE-200) - (PP-200)	0.291328	0.743	0.392	1
	(Nylon-100) - (Nylon-200)	-0.07321	0.428	-0.171	1		(HDPE-200) - (PP-50)	0.174008	0.761	0.229	1
	(Nylon-100) - (Nylon-50)	-0.12597	0.416	-0.303	1		(HDPE-50) - (LDPE-100)	0.267778	0.825	0.325	1
	(Nylon-100) - (PP-100)	-0.05211	0.438	-0.119	1		(HDPE-50) - (LDPE-200)	-0.604724	0.83	-0.729	1
	(Nylon-200) - (Nylon-50)	-0.05276	0.38	-0.139	1		(HDPE-50) - (LDPE-50)	0.380235	0.827	0.46	1
	(Nylon-200) - (PP-200)	0.11395	0.434	0.263	1		(HDPE-50) - (Nylon-100)	0.152618	0.819	0.186	1
	(Nylon-50) - (PP-50)	0.13916	0.392	0.355	1		(HDPE-50) - (Nylon-200)	-0.368027	0.856	-0.43	1
	(PP-100) - (PP-200)	0.09285	0.447	0.208	1		(HDPE-50) - (Nylon-50)	-0.563301	0.864	-0.652	1
	(PP-100) - (PP-50)	0.0653	0.417	0.157	1		(HDPE-50) - (PP-100)	0.075837	0.812	0.093	1
	(PP-200) - (PP-50)	-0.02756	0.444	-0.062	1		(HDPE-50) - (PP-200)	0.519662	0.794	0.655	1
1	(Control-Fresh) - (Control-Leachate)	-0.10259	0.347	-0.296	1		(HDPE-50) - (PP-50)	0.402341	0.811	0.496	1
	(Control-Fresh) - (HDPE-100)	0.48487	0.348	1.395	0.9828		(LDPE-100) - (LDPE-200)	-0.872501	0.815	-1.071	0.9986
	(Control-Fresh) - (HDPE-200)	0.0448	0.344	0.13	1		(LDPE-100) - (LDPE-50)	0.112457	0.811	0.139	1
	(Control-Fresh) - (HDPE-50)	-0.18517	0.379	-0.488	1		(LDPE-100) - (Nylon-100)	-0.115159	0.803	-0.143	1
	(Control-Fresh) - (LDPE-100)	0.45055	0.342	1.319	0.9896		(LDPE-100) - (Nylon-200)	-0.635805	0.841	-0.756	1
	(Control-Fresh) - (LDPE-200)	0.22173	0.346	0.641	1		(LDPE-100) - (Nylon-50)	-0.831079	0.85	-0.978	0.9995
	(Control-Fresh) - (LDPE-50)	0.36498	0.365	1	0.9993		(LDPE-100) - (PP-100)	-0.191941	0.796	-0.241	1
	(Control-Fresh) - (Nylon-100)	0.13101	0.349	0.376	1		(LDPE-100) - (PP-200)	0.251884	0.777	0.324	1
	(Control-Fresh) - (Nylon-200)	0.07389	0.316	0.234	1		(LDPE-100) - (PP-50)	0.134564	0.795	0.169	1
	(Control-Fresh) - (Nylon-50)	-0.02007	0.308	-0.065	1		(LDPE-200) - (LDPE-50)	0.984958	0.816	1.207	0.9955
	(Control-Fresh) - (PP-100)	0.05062	0.329	0.154	1		(LDPE-200) - (Nylon-100)	0.757342	0.809	0.936	0.9997
	(Control-Fresh) - (PP-200)	0.04621	0.355	0.13	1		(LDPE-200) - (Nylon-200)	0.236697	0.846	0.28	1
	(Control-Fresh) - (PP-50)	-0.0053	0.329	-0.016	1		(LDPE-200) - (Nylon-50)	0.041422	0.853	0.049	1
	(Control-Leachate) - (HDPE-100)	0.58747	0.376	1.561	0.9558		(LDPE-200) - (PP-100)	0.68056	0.802	0.849	0.9999
	(Control-Leachate) - (HDPE-200)	0.14739	0.373	0.395	1		(LDPE-200) - (PP-200)	1.12438	0.783	1.435	0.9779
	(Control-Leachate) - (HDPE-50)	-0.08257	0.405	-0.204	1		(LDPE-200) - (PP-50)	1.00707	0.801	1.258	0.9933
	(Control-Leachate) - (LDPE-100)	0.55314	0.372	1.485	0.9704		(LDPE-50) - (Nylon-100)	-0.227616	0.805	-0.283	1
	(Control-Leachate) - (LDPE-200)	0.32432	0.374	0.867	0.9999		(LDPE-50) - (Nylon-200)	-0.748262	0.843	-0.888	0.9998
	(Control-Leachate) - (LDPE-50)	0.46758	0.391	1.195	0.9959		(LDPE-50) - (Nylon-50)	-0.943536	0.852	-1.108	0.9981
	(Control-Leachate) - (Nylon-100)	0.23361	0.379	0.617	1		(LDPE-50) - (PP-100)	-0.304398	0.798	-0.382	1
	(Control-Leachate) - (Nylon-200)	0.17649	0.353	0.5	1		(LDPE-50) - (PP-200)	0.139427	0.778	0.179	1
	(Control-Leachate) - (Nylon-50)	0.08253	0.345	0.239	1		(LDPE-50) - (PP-50)	0.022106	0.796	0.028	1
	(Control-Leachate) - (PP-100)	0.15322	0.36	0.425	1		(Nylon-100) - (Nylon-200)	-0.520645	0.836	-0.623	1
	(Control-Leachate) - (PP-200)	0.14881	0.385	0.386	1		(Nylon-100) - (Nylon-50)	-0.71592	0.844	-0.848	0.9999
	(Control-Leachate) - (PP-50)	0.0973	0.362	0.269	1		(Nylon-100) - (PP-100)	-0.076782	0.79	-0.097	1
	(HDPE-100) - (HDPE-200)	-0.44007	0.374	-1.178	0.9964		(Nylon-100) - (PP-200)	0.367043	0.77	0.476	1
	(HDPE-100) - (HDPE-50)	-0.67004	0.405	-1.654	0.9316		(Nylon-100) - (PP-50)	0.249723	0.788	0.317	1
	(HDPE-100) - (LDPE-100)	-0.03433	0.372	-0.092	1		(Nylon-200) - (Nylon-50)	-0.195274	0.879	-0.222	1
	(HDPE-100) - (Nylon-100)	-0.35386	0.379	-0.933	0.9997		(Nylon-200) - (PP-100)	0.443863	0.829	0.535	1
	(HDPE-100) - (PP-100)	-0.43425	0.361	-1.203	0.9956		(Nylon-200) - (PP-200)	0.887688	0.811	1.095	0.9983
	(HDPE-200) - (HDPE-50)	-0.22996	0.401	-0.574	1		(Nylon-200) - (PP-50)	0.770368	0.828	0.931	0.9997
	(HDPE-200) - (LDPE-200)	0.17693	0.372	0.476	1		(Nylon-50) - (PP-100)	0.639138	0.837	0.763	1
	(HDPE-200) - (Nylon-200)	0.0291	0.349	0.083	1		(Nylon-50) - (PP-200)	1.08296	0.82	1.32	0.9894
	(HDPE-200) - (PP-200)	0.00142	0.381	0.004	1		(Nylon-50) - (PP-50)	0.965643	0.837	1.154	0.9971
	(HDPE-50) - (LDPE-50)	0.55015	0.417	1.319	0.9895		(PP-100) - (PP-200)	0.443825	0.763	0.581	1
	(HDPE-50) - (Nylon-50)	0.1651	0.377	0.438	1		(PP-100) - (PP-50)	0.326505	0.781	0.418	1
	(HDPE-50) - (PP-50)	0.17987	0.391	0.46	1		(PP-200) - (PP-50)	-0.11732	0.761	-0.154	1
	(LDPE-100) - (LDPE-200)	-0.22882	0.37	-0.618	1
	(LDPE-100) - (LDPE-50)	-0.08557	0.385	-0.222	1		Day.of.experiment = 1:
	(LDPE-100) - (Nylon-100)	-0.31954	0.374	-0.854	0.9999		contrast	estimate	SE	z.ratio	p.value
	(LDPE-100) - (PP-100)	-0.39993	0.357	-1.121	0.9978		(Control-Fresh) - (Control-Leachate)	0.005791	0.569	0.01	1
	(LDPE-200) - (LDPE-50)	0.14325	0.389	0.368	1		(Control-Fresh) - (HDPE-100)	-0.495153	0.588	-0.842	0.9999
	(LDPE-200) - (Nylon-200)	-0.14783	0.352	-0.42	1		(Control-Fresh) - (HDPE-200)	0.032807	0.552	0.059	1
	(LDPE-200) - (PP-200)	-0.17551	0.385	-0.456	1		(Control-Fresh) - (HDPE-50)	-0.212504	0.581	-0.366	1
	(LDPE-50) - (Nylon-50)	-0.38505	0.363	-1.061	0.9988		(Control-Fresh) - (LDPE-100)	-0.166117	0.577	-0.288	1
	(LDPE-50) - (PP-200)	-0.31877	0.4	-0.798	0.9999		(Control-Fresh) - (LDPE-200)	-0.448448	0.58	-0.773	1
	(LDPE-50) - (PP-50)	-0.37028	0.377	-0.982	0.9995		(Control-Fresh) - (LDPE-50)	-0.033593	0.571	-0.059	1
	(Nylon-100) - (Nylon-200)	-0.05712	0.354	-0.161	1		(Control-Fresh) - (Nylon-100)	-0.025042	0.563	-0.044	1
	(Nylon-100) - (Nylon-50)	-0.15108	0.344	-0.44	1		(Control-Fresh) - (Nylon-200)	-0.229616	0.581	-0.395	1
	(Nylon-100) - (PP-100)	-0.08039	0.361	-0.222	1		(Control-Fresh) - (Nylon-50)	-0.303314	0.586	-0.518	1
	(Nylon-200) - (Nylon-50)	-0.09396	0.314	-0.299	1		(Control-Fresh) - (PP-100)	-0.092285	0.564	-0.164	1
	(Nylon-200) - (PP-200)	-0.02768	0.359	-0.077	1		(Control-Fresh) - (PP-200)	0.113237	0.55	0.206	1
	(Nylon-50) - (PP-50)	0.01477	0.324	0.046	1		(Control-Fresh) - (PP-50)	0.060427	0.559	0.108	1
	(PP-100) - (PP-200)	-0.00441	0.37	-0.012	1		(Control-Leachate) - (HDPE-100)	-0.500944	0.598	-0.837	0.9999
	(PP-100) - (PP-50)	-0.05592	0.344	-0.163	1		(Control-Leachate) - (HDPE-200)	0.027016	0.563	0.048	1
	(PP-200) - (PP-50)	-0.05151	0.367	-0.14	1		(Control-Leachate) - (HDPE-50)	-0.218295	0.592	-0.369	1
3	(Control-Fresh) - (Control-Leachate)	-0.32763	0.27	-1.215	0.9952		(Control-Leachate) - (LDPE-100)	-0.171909	0.588	-0.293	1
	(Control-Fresh) - (HDPE-100)	1.04972	0.297	3.529	0.0282		(Control-Leachate) - (LDPE-200)	-0.454239	0.591	-0.769	1
	(Control-Fresh) - (HDPE-200)	0.25922	0.272	0.953	0.9996		(Control-Leachate) - (LDPE-50)	-0.039384	0.582	-0.068	1
	(Control-Fresh) - (HDPE-50)	-0.09627	0.299	-0.322	1		(Control-Leachate) - (Nylon-100)	-0.030833	0.574	-0.054	1
	(Control-Fresh) - (LDPE-100)	0.71263	0.284	2.505	0.404		(Control-Leachate) - (Nylon-200)	-0.235407	0.592	-0.398	1
	(Control-Fresh) - (LDPE-200)	0.84481	0.286	2.957	0.154		(Control-Leachate) - (Nylon-50)	-0.309105	0.596	-0.518	1
	(Control-Fresh) - (LDPE-50)	0.57833	0.292	1.98	0.7806		(Control-Leachate) - (PP-100)	-0.098076	0.575	-0.171	1
	(Control-Fresh) - (Nylon-100)	0.1662	0.285	0.584	1		(Control-Leachate) - (PP-200)	0.107446	0.562	0.191	1
	(Control-Fresh) - (Nylon-200)	0.14127	0.25	0.565	1		(Control-Leachate) - (PP-50)	0.054636	0.57	0.096	1
	(Control-Fresh) - (Nylon-50)	-0.03509	0.242	-0.145	1		(HDPE-100) - (HDPE-200)	0.52796	0.582	0.907	0.9998
	(Control-Fresh) - (PP-100)	0.02925	0.263	0.111	1		(HDPE-100) - (HDPE-50)	0.282649	0.609	0.464	1
	(Control-Fresh) - (PP-200)	-0.16967	0.296	-0.573	1		(HDPE-100) - (LDPE-100)	0.329036	0.606	0.543	1
	(Control-Fresh) - (PP-50)	-0.2691	0.258	-1.041	0.999		(HDPE-100) - (LDPE-200)	0.046705	0.608	0.077	1
	(Control-Leachate) - (HDPE-100)	1.37734	0.312	4.41	0.0009		(HDPE-100) - (LDPE-50)	0.46156	0.601	0.768	1
	(Control-Leachate) - (HDPE-200)	0.58685	0.288	2.039	0.7432		(HDPE-100) - (Nylon-100)	0.470111	0.593	0.792	1
	(Control-Leachate) - (HDPE-50)	0.23136	0.311	0.743	1		(HDPE-100) - (Nylon-200)	0.265538	0.61	0.436	1
	(Control-Leachate) - (LDPE-100)	1.04026	0.302	3.448	0.037		(HDPE-100) - (Nylon-50)	0.191839	0.614	0.313	1
	(Control-Leachate) - (LDPE-200)	1.17244	0.299	3.918	0.0068		(HDPE-100) - (PP-100)	0.402868	0.594	0.679	1
	(Control-Leachate) - (LDPE-50)	0.90596	0.305	2.968	0.1496		(HDPE-100) - (PP-200)	0.60839	0.581	1.047	0.9989
	(Control-Leachate) - (Nylon-100)	0.49383	0.301	1.643	0.9348		(HDPE-100) - (PP-50)	0.55558	0.589	0.943	0.9996
	(Control-Leachate) - (Nylon-200)	0.4689	0.273	1.715	0.9111		(HDPE-200) - (HDPE-50)	-0.245311	0.575	-0.426	1
	(Control-Leachate) - (Nylon-50)	0.29254	0.264	1.106	0.9981		(HDPE-200) - (LDPE-100)	-0.198925	0.571	-0.348	1
	(Control-Leachate) - (PP-100)	0.35688	0.279	1.278	0.9922		(HDPE-200) - (LDPE-200)	-0.481255	0.575	-0.838	0.9999
	(Control-Leachate) - (PP-200)	0.15796	0.315	0.502	1		(HDPE-200) - (LDPE-50)	-0.0664	0.565	-0.117	1
	(Control-Leachate) - (PP-50)	0.05853	0.277	0.211	1		(HDPE-200) - (Nylon-100)	-0.057849	0.557	-0.104	1
	(HDPE-100) - (HDPE-200)	-0.7905	0.311	-2.539	0.3808		(HDPE-200) - (Nylon-200)	-0.262423	0.575	-0.456	1
	(HDPE-100) - (HDPE-50)	-1.14598	0.335	-3.419	0.0405		(HDPE-200) - (Nylon-50)	-0.336121	0.58	-0.579	1
	(HDPE-100) - (LDPE-100)	-0.33709	0.323	-1.045	0.9989		(HDPE-200) - (PP-100)	-0.125092	0.558	-0.224	1
	(HDPE-100) - (Nylon-100)	-0.88351	0.325	-2.714	0.2703		(HDPE-200) - (PP-200)	0.08043	0.544	0.148	1
	(HDPE-100) - (PP-100)	-1.02047	0.306	-3.333	0.0533		(HDPE-200) - (PP-50)	0.02762	0.553	0.05	1
	(HDPE-200) - (HDPE-50)	-0.35549	0.31	-1.148	0.9972		(HDPE-50) - (LDPE-100)	0.046387	0.599	0.077	1
	(HDPE-200) - (LDPE-200)	0.58559	0.299	1.96	0.7929		(HDPE-50) - (LDPE-200)	-0.235944	0.602	-0.392	1
	(HDPE-200) - (Nylon-200)	-0.11795	0.273	-0.433	1		(HDPE-50) - (LDPE-50)	0.178911	0.594	0.301	1
	(HDPE-200) - (PP-200)	-0.42889	0.314	-1.364	0.9858		(HDPE-50) - (Nylon-100)	0.187462	0.586	0.32	1
	(HDPE-50) - (LDPE-50)	0.6746	0.324	2.079	0.7159		(HDPE-50) - (Nylon-200)	-0.017111	0.603	-0.028	1
	(HDPE-50) - (Nylon-50)	0.06118	0.292	0.209	1		(HDPE-50) - (Nylon-50)	-0.09081	0.608	-0.149	1
	(HDPE-50) - (PP-50)	-0.17283	0.302	-0.572	1		(HDPE-50) - (PP-100)	0.120219	0.587	0.205	1
	(LDPE-100) - (LDPE-200)	0.13219	0.309	0.428	1		(HDPE-50) - (PP-200)	0.325741	0.574	0.567	1
	(LDPE-100) - (LDPE-50)	-0.1343	0.313	-0.429	1		(HDPE-50) - (PP-50)	0.272931	0.582	0.469	1
	(LDPE-100) - (Nylon-100)	-0.54642	0.313	-1.747	0.8991		(LDPE-100) - (LDPE-200)	-0.28233	0.598	-0.472	1
	(LDPE-100) - (PP-100)	-0.68338	0.295	-2.32	0.5397		(LDPE-100) - (LDPE-50)	0.132525	0.59	0.225	1
	(LDPE-200) - (LDPE-50)	-0.26648	0.314	-0.85	0.9999		(LDPE-100) - (Nylon-100)	0.141076	0.582	0.242	1
	(LDPE-200) - (Nylon-200)	-0.70354	0.288	-2.445	0.4473		(LDPE-100) - (Nylon-200)	-0.063498	0.599	-0.106	1
	(LDPE-200) - (PP-200)	-1.01449	0.33	-3.073	0.1136		(LDPE-100) - (Nylon-50)	-0.137197	0.604	-0.227	1
	(LDPE-50) - (Nylon-50)	-0.61342	0.285	-2.15	0.666		(LDPE-100) - (PP-100)	0.073832	0.583	0.127	1
	(LDPE-50) - (PP-50)	-0.84743	0.296	-2.867	0.1918		(LDPE-100) - (PP-200)	0.279355	0.57	0.49	1
	(Nylon-100) - (Nylon-200)	-0.02494	0.286	-0.087	1		(LDPE-100) - (PP-50)	0.226544	0.578	0.392	1
	(Nylon-100) - (Nylon-50)	-0.2013	0.275	-0.732	1		(LDPE-200) - (LDPE-50)	0.414855	0.593	0.699	1
	(Nylon-100) - (PP-100)	-0.13695	0.292	-0.469	1		(LDPE-200) - (Nylon-100)	0.423406	0.586	0.723	1
	(Nylon-200) - (Nylon-50)	-0.17636	0.246	-0.718	1		(LDPE-200) - (Nylon-200)	0.218832	0.602	0.363	1
	(Nylon-200) - (PP-200)	-0.31094	0.297	-1.046	0.9989		(LDPE-200) - (Nylon-50)	0.145133	0.606	0.239	1
	(Nylon-50) - (PP-50)	-0.23401	0.25	-0.937	0.9997		(LDPE-200) - (PP-100)	0.356162	0.586	0.608	1
	(PP-100) - (PP-200)	-0.19892	0.309	-0.643	1		(LDPE-200) - (PP-200)	0.561685	0.574	0.979	0.9995
	(PP-100) - (PP-50)	-0.29835	0.269	-1.109	0.998		(LDPE-200) - (PP-50)	0.508875	0.582	0.875	0.9998
	(PP-200) - (PP-50)	-0.09943	0.302	-0.33	1		(LDPE-50) - (Nylon-100)	0.008551	0.577	0.015	1
5	(Control-Fresh) - (Control-Leachate)	-0.55266	0.339	-1.632	0.938		(LDPE-50) - (Nylon-200)	-0.196023	0.594	-0.33	1
	(Control-Fresh) - (HDPE-100)	1.61456	0.401	4.023	0.0045		(LDPE-50) - (Nylon-50)	-0.269722	0.599	-0.45	1
	(Control-Fresh) - (HDPE-200)	0.47364	0.339	1.395	0.9827		(LDPE-50) - (PP-100)	-0.058693	0.578	-0.102	1
	(Control-Fresh) - (HDPE-50)	-0.00737	0.388	-0.019	1		(LDPE-50) - (PP-200)	0.14683	0.564	0.26	1
	(Control-Fresh) - (LDPE-100)	0.97471	0.369	2.642	0.3136		(LDPE-50) - (PP-50)	0.09402	0.573	0.164	1
	(Control-Fresh) - (LDPE-200)	1.4679	0.373	3.931	0.0065		(Nylon-100) - (Nylon-200)	-0.204574	0.587	-0.349	1
	(Control-Fresh) - (LDPE-50)	0.79168	0.365	2.17	0.6514		(Nylon-100) - (Nylon-50)	-0.278273	0.591	-0.471	1
	(Control-Fresh) - (Nylon-100)	0.2014	0.366	0.55	1		(Nylon-100) - (PP-100)	-0.067244	0.57	-0.118	1
	(Control-Fresh) - (Nylon-200)	0.20864	0.316	0.661	1		(Nylon-100) - (PP-200)	0.138279	0.556	0.249	1
	(Control-Fresh) - (Nylon-50)	-0.05012	0.303	-0.165	1		(Nylon-100) - (PP-50)	0.085469	0.565	0.151	1
	(Control-Fresh) - (PP-100)	0.00788	0.336	0.023	1		(Nylon-200) - (Nylon-50)	-0.073699	0.608	-0.121	1
	(Control-Fresh) - (PP-200)	-0.38556	0.391	-0.987	0.9994		(Nylon-200) - (PP-100)	0.13733	0.587	0.234	1
	(Control-Fresh) - (PP-50)	-0.5329	0.322	-1.656	0.9308		(Nylon-200) - (PP-200)	0.342853	0.574	0.597	1
	(Control-Leachate) - (HDPE-100)	2.16722	0.419	5.178	<.0001		(Nylon-200) - (PP-50)	0.290043	0.583	0.498	1
	(Control-Leachate) - (HDPE-200)	1.0263	0.358	2.867	0.1918		(Nylon-50) - (PP-100)	0.211029	0.592	0.357	1
	(Control-Leachate) - (HDPE-50)	0.54529	0.402	1.356	0.9865		(Nylon-50) - (PP-200)	0.416552	0.579	0.719	1
	(Control-Leachate) - (LDPE-100)	1.52737	0.388	3.935	0.0064		(Nylon-50) - (PP-50)	0.363741	0.587	0.619	1
	(Control-Leachate) - (LDPE-200)	2.02056	0.389	5.195	<.0001		(PP-100) - (PP-200)	0.205523	0.557	0.369	1
	(Control-Leachate) - (LDPE-50)	1.34434	0.381	3.531	0.028		(PP-100) - (PP-50)	0.152712	0.565	0.27	1
	(Control-Leachate) - (Nylon-100)	0.75406	0.384	1.966	0.7894		(PP-200) - (PP-50)	-0.05281	0.552	-0.096	1
	(Control-Leachate) - (Nylon-200)	0.7613	0.34	2.239	0.6006
	(Control-Leachate) - (Nylon-50)	0.50254	0.326	1.54	0.9603		Day.of.experiment = 3:
	(Control-Leachate) - (PP-100)	0.56054	0.354	1.584	0.9506		contrast	estimate	SE	z.ratio	p.value
	(Control-Leachate) - (PP-200)	0.1671	0.411	0.407	1		(Control-Fresh) - (Control-Leachate)	-0.059615	0.357	-0.167	1
	(Control-Leachate) - (PP-50)	0.01976	0.342	0.058	1		(Control-Fresh) - (HDPE-100)	0.286781	0.332	0.863	0.9999
	(HDPE-100) - (HDPE-200)	-1.14092	0.413	-2.76	0.245		(Control-Fresh) - (HDPE-200)	0.097699	0.332	0.294	1
	(HDPE-100) - (HDPE-50)	-1.62193	0.455	-3.561	0.0253		(Control-Fresh) - (HDPE-50)	-0.181568	0.341	-0.533	1
	(HDPE-100) - (LDPE-100)	-0.63985	0.438	-1.462	0.9742		(Control-Fresh) - (LDPE-100)	-0.577963	0.332	-1.739	0.9022
	(HDPE-100) - (Nylon-100)	-1.41316	0.44	-3.212	0.0768		(Control-Fresh) - (LDPE-200)	0.320048	0.329	0.972	0.9995
	(HDPE-100) - (PP-100)	-1.60668	0.415	-3.873	0.0081		(Control-Fresh) - (LDPE-50)	-0.405303	0.344	-1.18	0.9964
	(HDPE-200) - (LDPE-200)	0.99426	0.384	2.591	0.3458		(Control-Fresh) - (Nylon-100)	0.075582	0.345	0.219	1
	(HDPE-200) - (Nylon-200)	-0.265	0.336	-0.789	1		(Control-Fresh) - (Nylon-200)	0.503152	0.356	1.415	0.9804
	(HDPE-200) - (PP-200)	-0.8592	0.41	-2.096	0.7041		(Control-Fresh) - (Nylon-50)	0.672604	0.348	1.935	0.8072
	(HDPE-50) - (LDPE-50)	0.79905	0.417	1.918	0.8171		(Control-Fresh) - (PP-100)	0.027415	0.336	0.082	1
	(HDPE-50) - (Nylon-50)	-0.04275	0.374	-0.114	1		(Control-Fresh) - (PP-200)	-0.243667	0.339	-0.718	1
	(HDPE-50) - (PP-50)	-0.52553	0.386	-1.36	0.9862		(Control-Fresh) - (PP-50)	-0.167457	0.346	-0.484	1
	(LDPE-100) - (LDPE-200)	0.49319	0.408	1.209	0.9954		(Control-Leachate) - (HDPE-100)	0.346396	0.352	0.984	0.9994
	(LDPE-100) - (LDPE-50)	-0.18303	0.402	-0.456	1		(Control-Leachate) - (HDPE-200)	0.157314	0.352	0.447	1
	(LDPE-100) - (Nylon-100)	-0.77331	0.409	-1.891	0.832		(Control-Leachate) - (HDPE-50)	-0.121953	0.36	-0.339	1
	(LDPE-100) - (PP-100)	-0.96683	0.383	-2.523	0.3918		(Control-Leachate) - (LDPE-100)	-0.518348	0.352	-1.473	0.9724
	(LDPE-200) - (Nylon-200)	-1.25926	0.371	-3.393	0.0441		(Control-Leachate) - (LDPE-200)	0.379663	0.349	1.088	0.9984
	(LDPE-200) - (PP-200)	-1.85346	0.444	-4.175	0.0024		(Control-Leachate) - (LDPE-50)	-0.345689	0.362	-0.954	0.9996
	(LDPE-50) - (Nylon-50)	-0.8418	0.35	-2.403	0.4776		(Control-Leachate) - (Nylon-100)	0.135197	0.364	0.371	1
	(LDPE-50) - (PP-50)	-1.32458	0.364	-3.638	0.0194		(Control-Leachate) - (Nylon-200)	0.562767	0.374	1.504	0.9673
	(Nylon-100) - (Nylon-200)	0.00724	0.364	0.02	1		(Control-Leachate) - (Nylon-50)	0.732219	0.367	1.997	0.7702
	(Nylon-100) - (Nylon-50)	-0.25152	0.35	-0.718	1		(Control-Leachate) - (PP-100)	0.08703	0.355	0.245	1
	(Nylon-100) - (PP-100)	-0.19352	0.379	-0.511	1		(Control-Leachate) - (PP-200)	-0.184052	0.358	-0.514	1
	(Nylon-200) - (Nylon-50)	-0.25876	0.304	-0.852	0.9999		(Control-Leachate) - (PP-50)	-0.107842	0.365	-0.296	1
	(Nylon-200) - (PP-200)	-0.5942	0.39	-1.522	0.9639		(HDPE-100) - (HDPE-200)	-0.189082	0.327	-0.578	1
	(Nylon-50) - (PP-50)	-0.48278	0.306	-1.577	0.9523		(HDPE-100) - (HDPE-50)	-0.468349	0.336	-1.395	0.9827
	(PP-100) - (PP-200)	-0.39344	0.409	-0.961	0.9996		(HDPE-100) - (LDPE-100)	-0.864744	0.327	-2.641	0.3143
	(PP-100) - (PP-50)	-0.54078	0.337	-1.603	0.9459		(HDPE-100) - (LDPE-200)	0.033267	0.324	0.103	1
	(PP-200) - (PP-50)	-0.14734	0.394	-0.374	1		(HDPE-100) - (LDPE-50)	-0.692085	0.339	-2.043	0.7404
7	(Control-Fresh) - (Control-Leachate)	-0.7777	0.496	-1.567	0.9545		(HDPE-100) - (Nylon-100)	-0.211199	0.34	-0.621	1
	(Control-Fresh) - (HDPE-100)	2.1794	0.582	3.744	0.0132		(HDPE-100) - (Nylon-200)	0.216371	0.35	0.618	1
	(Control-Fresh) - (HDPE-200)	0.68806	0.492	1.398	0.9823		(HDPE-100) - (Nylon-50)	0.385823	0.342	1.129	0.9977
	(Control-Fresh) - (HDPE-50)	0.08153	0.572	0.142	1		(HDPE-100) - (PP-100)	-0.259366	0.331	-0.784	1
	(Control-Fresh) - (LDPE-100)	1.23679	0.531	2.327	0.5344		(HDPE-100) - (PP-200)	-0.530448	0.334	-1.587	0.9497
	(Control-Fresh) - (LDPE-200)	2.09098	0.541	3.863	0.0085		(HDPE-100) - (PP-50)	-0.454238	0.341	-1.333	0.9885
	(Control-Fresh) - (LDPE-50)	1.00503	0.526	1.912	0.8205		(HDPE-200) - (HDPE-50)	-0.279267	0.336	-0.831	0.9999
	(Control-Fresh) - (Nylon-100)	0.23659	0.53	0.446	1		(HDPE-200) - (LDPE-100)	-0.675662	0.327	-2.063	0.7268
	(Control-Fresh) - (Nylon-200)	0.27601	0.46	0.6	1		(HDPE-200) - (LDPE-200)	0.222349	0.324	0.687	1
	(Control-Fresh) - (Nylon-50)	-0.06514	0.442	-0.147	1		(HDPE-200) - (LDPE-50)	-0.503003	0.339	-1.485	0.9706
	(Control-Fresh) - (PP-100)	-0.01349	0.49	-0.028	1		(HDPE-200) - (Nylon-100)	-0.022117	0.34	-0.065	1
	(Control-Fresh) - (PP-200)	-0.60145	0.566	-1.062	0.9988		(HDPE-200) - (Nylon-200)	0.405452	0.351	1.157	0.997
	(Control-Fresh) - (PP-50)	-0.7967	0.467	-1.705	0.9146		(HDPE-200) - (Nylon-50)	0.574905	0.342	1.68	0.9234
	(Control-Leachate) - (HDPE-100)	2.9571	0.612	4.832	0.0001		(HDPE-200) - (PP-100)	-0.070284	0.331	-0.212	1
	(Control-Leachate) - (HDPE-200)	1.46576	0.525	2.794	0.2273		(HDPE-200) - (PP-200)	-0.341366	0.334	-1.021	0.9992
	(Control-Leachate) - (HDPE-50)	0.85922	0.598	1.436	0.9778		(HDPE-200) - (PP-50)	-0.265156	0.341	-0.778	1
	(Control-Leachate) - (LDPE-100)	2.01448	0.564	3.575	0.0241		(HDPE-50) - (LDPE-100)	-0.396395	0.335	-1.182	0.9963
	(Control-Leachate) - (LDPE-200)	2.86868	0.57	5.031	<.0001		(HDPE-50) - (LDPE-200)	0.501616	0.333	1.508	0.9666
	(Control-Leachate) - (LDPE-50)	1.78272	0.556	3.209	0.0775		(HDPE-50) - (LDPE-50)	-0.223735	0.347	-0.645	1
	(Control-Leachate) - (Nylon-100)	1.01429	0.56	1.81	0.872		(HDPE-50) - (Nylon-100)	0.25715	0.349	0.737	1
	(Control-Leachate) - (Nylon-200)	1.05371	0.497	2.119	0.6879		(HDPE-50) - (Nylon-200)	0.68472	0.359	1.907	0.8232
	(Control-Leachate) - (Nylon-50)	0.71255	0.478	1.49	0.9697		(HDPE-50) - (Nylon-50)	0.854172	0.351	2.431	0.4571
	(Control-Leachate) - (PP-100)	0.76421	0.521	1.467	0.9734		(HDPE-50) - (PP-100)	0.208983	0.339	0.616	1
	(Control-Leachate) - (PP-200)	0.17625	0.598	0.295	1		(HDPE-50) - (PP-200)	-0.062099	0.342	-0.181	1
	(Control-Leachate) - (PP-50)	-0.01901	0.5	-0.038	1		(HDPE-50) - (PP-50)	0.014111	0.349	0.04	1
	(HDPE-100) - (HDPE-200)	-1.49134	0.601	-2.481	0.4215		(LDPE-100) - (LDPE-200)	0.898012	0.324	2.768	0.2408
	(HDPE-100) - (HDPE-50)	-2.09788	0.67	-3.129	0.0974		(LDPE-100) - (LDPE-50)	0.17266	0.338	0.511	1
	(HDPE-100) - (LDPE-100)	-0.94262	0.633	-1.488	0.97		(LDPE-100) - (Nylon-100)	0.653545	0.341	1.919	0.8164
	(HDPE-100) - (Nylon-100)	-1.94282	0.638	-3.046	0.1223		(LDPE-100) - (Nylon-200)	1.08112	0.352	3.074	0.1134
	(HDPE-100) - (PP-100)	-2.19289	0.604	-3.628	0.02		(LDPE-100) - (Nylon-50)	1.25057	0.344	3.633	0.0197
	(HDPE-200) - (HDPE-50)	-0.60653	0.59	-1.029	0.9991		(LDPE-100) - (PP-100)	0.605379	0.331	1.83	0.863
	(HDPE-200) - (LDPE-200)	1.40292	0.559	2.511	0.4002		(LDPE-100) - (PP-200)	0.334296	0.334	1.002	0.9993
	(HDPE-200) - (Nylon-200)	-0.41205	0.488	-0.845	0.9999		(LDPE-100) - (PP-50)	0.410506	0.34	1.206	0.9955
	(HDPE-200) - (PP-200)	-1.28951	0.594	-2.171	0.6507		(LDPE-200) - (LDPE-50)	-0.725352	0.336	-2.16	0.6589
	(HDPE-50) - (LDPE-50)	0.9235	0.615	1.501	0.9679		(LDPE-200) - (Nylon-100)	-0.244466	0.337	-0.725	1
	(HDPE-50) - (Nylon-50)	-0.14667	0.553	-0.265	1		(LDPE-200) - (Nylon-200)	0.183103	0.347	0.528	1
	(HDPE-50) - (PP-50)	-0.87823	0.572	-1.536	0.9612		(LDPE-200) - (Nylon-50)	0.352556	0.339	1.041	0.999
	(LDPE-100) - (LDPE-200)	0.8542	0.591	1.444	0.9766		(LDPE-200) - (PP-100)	-0.292633	0.328	-0.893	0.9998
	(LDPE-100) - (LDPE-50)	-0.23176	0.581	-0.399	1		(LDPE-200) - (PP-200)	-0.563715	0.331	-1.702	0.9156
	(LDPE-100) - (Nylon-100)	-1.0002	0.59	-1.695	0.9182		(LDPE-200) - (PP-50)	-0.487505	0.338	-1.443	0.9768
	(LDPE-100) - (PP-100)	-1.25028	0.555	-2.254	0.5892		(LDPE-50) - (Nylon-100)	0.480886	0.351	1.368	0.9854
	(LDPE-200) - (LDPE-50)	-1.08596	0.585	-1.857	0.8496		(LDPE-50) - (Nylon-200)	0.908455	0.362	2.509	0.4017
	(LDPE-200) - (Nylon-200)	-1.81497	0.537	-3.378	0.0463		(LDPE-50) - (Nylon-50)	1.07791	0.355	3.039	0.1247
	(LDPE-200) - (PP-200)	-2.69243	0.642	-4.194	0.0022		(LDPE-50) - (PP-100)	0.432719	0.342	1.265	0.9929
	(LDPE-50) - (Nylon-50)	-1.07017	0.506	-2.117	0.6899		(LDPE-50) - (PP-200)	0.161637	0.345	0.469	1
	(LDPE-50) - (PP-50)	-1.80173	0.527	-3.419	0.0407		(LDPE-50) - (PP-50)	0.237847	0.351	0.677	1
	(Nylon-100) - (Nylon-200)	0.03942	0.527	0.075	1		(Nylon-100) - (Nylon-200)	0.427569	0.363	1.178	0.9964
	(Nylon-100) - (Nylon-50)	-0.30173	0.51	-0.592	1		(Nylon-100) - (Nylon-50)	0.597022	0.355	1.682	0.9227
	(Nylon-100) - (PP-100)	-0.25008	0.552	-0.453	1		(Nylon-100) - (PP-100)	-0.048167	0.344	-0.14	1
	(Nylon-200) - (Nylon-50)	-0.34116	0.441	-0.773	1		(Nylon-100) - (PP-200)	-0.319249	0.347	-0.92	0.9997
	(Nylon-200) - (PP-200)	-0.87746	0.566	-1.549	0.9585		(Nylon-100) - (PP-50)	-0.243039	0.353	-0.688	1
	(Nylon-50) - (PP-50)	-0.73156	0.446	-1.64	0.9357		(Nylon-200) - (Nylon-50)	0.169452	0.363	0.466	1
	(PP-100) - (PP-200)	-0.58796	0.594	-0.99	0.9994		(Nylon-200) - (PP-100)	-0.475736	0.354	-1.344	0.9876
	(PP-100) - (PP-50)	-0.78321	0.493	-1.59	0.9491		(Nylon-200) - (PP-200)	-0.746818	0.358	-2.088	0.7098
	(PP-200) - (PP-50)	-0.19525	0.571	-0.342	1		(Nylon-200) - (PP-50)	-0.670608	0.364	-1.844	0.8562
							(Nylon-50) - (PP-100)	-0.645189	0.346	-1.865	0.8456
							(Nylon-50) - (PP-200)	-0.916271	0.35	-2.618	0.3286
							(Nylon-50) - (PP-50)	-0.840061	0.356	-2.359	0.5107
							(PP-100) - (PP-200)	-0.271082	0.338	-0.803	0.9999
							(PP-100) - (PP-50)	-0.194872	0.344	-0.566	1
							(PP-200) - (PP-50)	0.07621	0.347	0.22	1
							Day.of.experiment = 5:
							contrast	estimate	SE	z.ratio	p.value
							(Control-Fresh) - (Control-Leachate)	-0.125021	0.709	-0.176	1
							(Control-Fresh) - (HDPE-100)	1.06872	0.616	1.734	0.904
							(Control-Fresh) - (HDPE-200)	0.162591	0.605	0.269	1
							(Control-Fresh) - (HDPE-50)	-0.150632	0.653	-0.231	1
							(Control-Fresh) - (LDPE-100)	-0.989809	0.601	-1.647	0.9335
							(Control-Fresh) - (LDPE-200)	1.08855	0.599	1.817	0.8692
							(Control-Fresh) - (LDPE-50)	-0.777014	0.651	-1.193	0.996
							(Control-Fresh) - (Nylon-100)	0.176207	0.665	0.265	1
							(Control-Fresh) - (Nylon-200)	1.23592	0.729	1.694	0.9185
							(Control-Fresh) - (Nylon-50)	1.64852	0.725	2.275	0.5734
							(Control-Fresh) - (PP-100)	0.147116	0.622	0.236	1
							(Control-Fresh) - (PP-200)	-0.60057	0.623	-0.964	0.9996
							(Control-Fresh) - (PP-50)	-0.39534	0.655	-0.604	1
							(Control-Leachate) - (HDPE-100)	1.19374	0.701	1.703	0.9155
							(Control-Leachate) - (HDPE-200)	0.287612	0.69	0.417	1
							(Control-Leachate) - (HDPE-50)	-0.025611	0.733	-0.035	1
							(Control-Leachate) - (LDPE-100)	-0.864788	0.687	-1.259	0.9932
							(Control-Leachate) - (LDPE-200)	1.21357	0.686	1.769	0.8903
							(Control-Leachate) - (LDPE-50)	-0.651993	0.731	-0.891	0.9998
							(Control-Leachate) - (Nylon-100)	0.301227	0.744	0.405	1
							(Control-Leachate) - (Nylon-200)	1.36094	0.802	1.696	0.9179
							(Control-Leachate) - (Nylon-50)	1.77354	0.798	2.222	0.6136
							(Control-Leachate) - (PP-100)	0.272137	0.706	0.386	1
							(Control-Leachate) - (PP-200)	-0.47555	0.706	-0.674	1
							(Control-Leachate) - (PP-50)	-0.27032	0.735	-0.368	1
							(HDPE-100) - (HDPE-200)	-0.906124	0.594	-1.526	0.9632
							(HDPE-100) - (HDPE-50)	-1.21935	0.643	-1.895	0.8295
							(HDPE-100) - (LDPE-100)	-2.05852	0.592	-3.475	0.0338
							(HDPE-100) - (LDPE-200)	0.019829	0.585	0.034	1
							(HDPE-100) - (LDPE-50)	-1.84573	0.644	-2.868	0.1915
							(HDPE-100) - (Nylon-100)	-0.892509	0.655	-1.363	0.9859
							(HDPE-100) - (Nylon-200)	0.167204	0.718	0.233	1
							(HDPE-100) - (Nylon-50)	0.579807	0.71	0.816	0.9999
							(HDPE-100) - (PP-100)	-0.921599	0.612	-1.507	0.9668
							(HDPE-100) - (PP-200)	-1.66929	0.615	-2.716	0.2693
							(HDPE-100) - (PP-50)	-1.46406	0.647	-2.264	0.5819
							(HDPE-200) - (HDPE-50)	-0.313223	0.632	-0.495	1
							(HDPE-200) - (LDPE-100)	-1.1524	0.579	-1.992	0.7731
							(HDPE-200) - (LDPE-200)	0.925953	0.576	1.607	0.9447
							(HDPE-200) - (LDPE-50)	-0.939605	0.631	-1.489	0.9698
							(HDPE-200) - (Nylon-100)	0.013615	0.644	0.021	1
							(HDPE-200) - (Nylon-200)	1.07333	0.71	1.511	0.9661
							(HDPE-200) - (Nylon-50)	1.48593	0.705	2.107	0.6964
							(HDPE-200) - (PP-100)	-0.015475	0.6	-0.026	1
							(HDPE-200) - (PP-200)	-0.763162	0.601	-1.269	0.9927
							(HDPE-200) - (PP-50)	-0.557932	0.635	-0.879	0.9998
							(HDPE-50) - (LDPE-100)	-0.839177	0.629	-1.335	0.9883
							(HDPE-50) - (LDPE-200)	1.23918	0.627	1.976	0.7829
							(HDPE-50) - (LDPE-50)	-0.626382	0.677	-0.925	0.9997
							(HDPE-50) - (Nylon-100)	0.326838	0.69	0.474	1
							(HDPE-50) - (Nylon-200)	1.38655	0.752	1.843	0.8567
							(HDPE-50) - (Nylon-50)	1.79915	0.748	2.407	0.4751
							(HDPE-50) - (PP-100)	0.297748	0.649	0.459	1
							(HDPE-50) - (PP-200)	-0.449939	0.65	-0.692	1
							(HDPE-50) - (PP-50)	-0.244709	0.681	-0.359	1
							(LDPE-100) - (LDPE-200)	2.07835	0.575	3.617	0.0208
							(LDPE-100) - (LDPE-50)	0.212795	0.626	0.34	1
							(LDPE-100) - (Nylon-100)	1.16602	0.641	1.819	0.8681
							(LDPE-100) - (Nylon-200)	2.22573	0.71	3.137	0.0953
							(LDPE-100) - (Nylon-50)	2.63833	0.706	3.738	0.0135
							(LDPE-100) - (PP-100)	1.13692	0.597	1.904	0.8246
							(LDPE-100) - (PP-200)	0.389238	0.596	0.653	1
							(LDPE-100) - (PP-50)	0.594468	0.63	0.943	0.9996
							(LDPE-200) - (LDPE-50)	-1.86556	0.627	-2.974	0.1475
							(LDPE-200) - (Nylon-100)	-0.912338	0.639	-1.428	0.9788
							(LDPE-200) - (Nylon-200)	0.147374	0.703	0.21	1
							(LDPE-200) - (Nylon-50)	0.559978	0.695	0.805	0.9999
							(LDPE-200) - (PP-100)	-0.941428	0.594	-1.584	0.9506
							(LDPE-200) - (PP-200)	-1.68911	0.598	-2.827	0.211
							(LDPE-200) - (PP-50)	-1.48388	0.63	-2.354	0.5147
							(LDPE-50) - (Nylon-100)	0.95322	0.689	1.384	0.9839
							(LDPE-50) - (Nylon-200)	2.01293	0.753	2.674	0.294
							(LDPE-50) - (Nylon-50)	2.42554	0.749	3.238	0.0712
							(LDPE-50) - (PP-100)	0.92413	0.648	1.426	0.979
							(LDPE-50) - (PP-200)	0.176444	0.647	0.273	1
							(LDPE-50) - (PP-50)	0.381673	0.679	0.562	1
							(Nylon-100) - (Nylon-200)	1.05971	0.762	1.39	0.9832
							(Nylon-100) - (Nylon-50)	1.47232	0.757	1.944	0.8021
							(Nylon-100) - (PP-100)	-0.02909	0.661	-0.044	1
							(Nylon-100) - (PP-200)	-0.776777	0.662	-1.174	0.9966
							(Nylon-100) - (PP-50)	-0.571547	0.692	-0.826	0.9999
							(Nylon-200) - (Nylon-50)	0.412604	0.81	0.509	1
							(Nylon-200) - (PP-100)	-1.0888	0.725	-1.501	0.9678
							(Nylon-200) - (PP-200)	-1.83649	0.728	-2.522	0.3925
							(Nylon-200) - (PP-50)	-1.63126	0.755	-2.159	0.6593
							(Nylon-50) - (PP-100)	-1.50141	0.72	-2.085	0.712
							(Nylon-50) - (PP-200)	-2.24909	0.725	-3.104	0.1044
							(Nylon-50) - (PP-50)	-2.04386	0.751	-2.72	0.2672
							(PP-100) - (PP-200)	-0.747687	0.619	-1.208	0.9954
							(PP-100) - (PP-50)	-0.542457	0.651	-0.833	0.9999
							(PP-200) - (PP-50)	0.20523	0.651	0.315	1
							Day.of.experiment = 7:
							contrast	estimate	SE	z.ratio	p.value
							(Control-Fresh) - (Control-Leachate)	-0.190427	1.2	-0.158	1
							(Control-Fresh) - (HDPE-100)	1.85065	1.07	1.723	0.9083
							(Control-Fresh) - (HDPE-200)	0.227484	1.03	0.22	1
							(Control-Fresh) - (HDPE-50)	-0.119696	1.13	-0.106	1
							(Control-Fresh) - (LDPE-100)	-1.40165	1.04	-1.346	0.9874
							(Control-Fresh) - (LDPE-200)	1.85704	1.04	1.779	0.8857
							(Control-Fresh) - (LDPE-50)	-1.14872	1.12	-1.029	0.9991
							(Control-Fresh) - (Nylon-100)	0.276831	1.13	0.244	1
							(Control-Fresh) - (Nylon-200)	1.96869	1.25	1.579	0.9518
							(Control-Fresh) - (Nylon-50)	2.62444	1.25	2.104	0.6987
							(Control-Fresh) - (PP-100)	0.266817	1.07	0.25	1
							(Control-Fresh) - (PP-200)	-0.957474	1.06	-0.904	0.9998
							(Control-Fresh) - (PP-50)	-0.623224	1.11	-0.559	1
							(Control-Leachate) - (HDPE-100)	2.04108	1.21	1.689	0.9204
							(Control-Leachate) - (HDPE-200)	0.41791	1.17	0.356	1
							(Control-Leachate) - (HDPE-50)	0.070731	1.25	0.056	1
							(Control-Leachate) - (LDPE-100)	-1.21123	1.18	-1.028	0.9991
							(Control-Leachate) - (LDPE-200)	2.04747	1.18	1.733	0.9045
							(Control-Leachate) - (LDPE-50)	-0.958298	1.24	-0.77	1
							(Control-Leachate) - (Nylon-100)	0.467257	1.26	0.371	1
							(Control-Leachate) - (Nylon-200)	2.15911	1.36	1.582	0.951
							(Control-Leachate) - (Nylon-50)	2.81487	1.37	2.062	0.7279
							(Control-Leachate) - (PP-100)	0.457244	1.2	0.38	1
							(Control-Leachate) - (PP-200)	-0.767047	1.19	-0.642	1
							(Control-Leachate) - (PP-50)	-0.432797	1.24	-0.348	1
							(HDPE-100) - (HDPE-200)	-1.62317	1.04	-1.565	0.955
							(HDPE-100) - (HDPE-50)	-1.97035	1.13	-1.745	0.8997
							(HDPE-100) - (LDPE-100)	-3.2523	1.05	-3.104	0.1044
							(HDPE-100) - (LDPE-200)	0.006391	1.04	0.006	1
							(HDPE-100) - (LDPE-50)	-2.99937	1.12	-2.673	0.2944
							(HDPE-100) - (Nylon-100)	-1.57382	1.14	-1.385	0.9838
							(HDPE-100) - (Nylon-200)	0.118036	1.24	0.095	1
							(HDPE-100) - (Nylon-50)	0.773791	1.24	0.624	1
							(HDPE-100) - (PP-100)	-1.58383	1.07	-1.479	0.9715
							(HDPE-100) - (PP-200)	-2.80812	1.07	-2.635	0.3181
							(HDPE-100) - (PP-50)	-2.47387	1.12	-2.21	0.6225
							(HDPE-200) - (HDPE-50)	-0.347179	1.09	-0.318	1
							(HDPE-200) - (LDPE-100)	-1.62914	1	-1.622	0.9407
							(HDPE-200) - (LDPE-200)	1.62956	1.01	1.621	0.9411
							(HDPE-200) - (LDPE-50)	-1.37621	1.08	-1.273	0.9925
							(HDPE-200) - (Nylon-100)	0.049347	1.1	0.045	1
							(HDPE-200) - (Nylon-200)	1.7412	1.22	1.433	0.9782
							(HDPE-200) - (Nylon-50)	2.39696	1.22	1.973	0.7852
							(HDPE-200) - (PP-100)	0.039333	1.03	0.038	1
							(HDPE-200) - (PP-200)	-1.18496	1.02	-1.159	0.997
							(HDPE-200) - (PP-50)	-0.850708	1.08	-0.788	1
							(HDPE-50) - (LDPE-100)	-1.28196	1.1	-1.167	0.9968
							(HDPE-50) - (LDPE-200)	1.97674	1.1	1.797	0.878
							(HDPE-50) - (LDPE-50)	-1.02903	1.17	-0.88	0.9998
							(HDPE-50) - (Nylon-100)	0.396526	1.19	0.334	1
							(HDPE-50) - (Nylon-200)	2.08838	1.29	1.613	0.9431
							(HDPE-50) - (Nylon-50)	2.74414	1.29	2.12	0.6875
							(HDPE-50) - (PP-100)	0.386513	1.12	0.344	1
							(HDPE-50) - (PP-200)	-0.837779	1.12	-0.751	1
							(HDPE-50) - (PP-50)	-0.503529	1.17	-0.431	1
							(LDPE-100) - (LDPE-200)	3.25869	1.02	3.206	0.0781
							(LDPE-100) - (LDPE-50)	0.25293	1.09	0.233	1
							(LDPE-100) - (Nylon-100)	1.67849	1.11	1.517	0.9649
							(LDPE-100) - (Nylon-200)	3.37034	1.22	2.753	0.2487
							(LDPE-100) - (Nylon-50)	4.0261	1.23	3.284	0.062
							(LDPE-100) - (PP-100)	1.66847	1.04	1.605	0.9453
							(LDPE-100) - (PP-200)	0.44418	1.03	0.432	1
							(LDPE-100) - (PP-50)	0.77843	1.09	0.717	1
							(LDPE-200) - (LDPE-50)	-3.00577	1.09	-2.751	0.2501
							(LDPE-200) - (Nylon-100)	-1.58021	1.11	-1.427	0.979
							(LDPE-200) - (Nylon-200)	0.111645	1.22	0.092	1
							(LDPE-200) - (Nylon-50)	0.7674	1.21	0.632	1
							(LDPE-200) - (PP-100)	-1.59022	1.04	-1.529	0.9626
							(LDPE-200) - (PP-200)	-2.81452	1.04	-2.719	0.2676
							(LDPE-200) - (PP-50)	-2.48027	1.09	-2.275	0.5737
							(LDPE-50) - (Nylon-100)	1.42555	1.18	1.211	0.9953
							(LDPE-50) - (Nylon-200)	3.11741	1.29	2.42	0.4656
							(LDPE-50) - (Nylon-50)	3.77317	1.29	2.924	0.1671
							(LDPE-50) - (PP-100)	1.41554	1.11	1.27	0.9926
							(LDPE-50) - (PP-200)	0.19125	1.1	0.173	1
							(LDPE-50) - (PP-50)	0.5255	1.16	0.454	1
							(Nylon-100) - (Nylon-200)	1.69186	1.3	1.301	0.9908
							(Nylon-100) - (Nylon-50)	2.34761	1.3	1.805	0.8745
							(Nylon-100) - (PP-100)	-0.010014	1.13	-0.009	1
							(Nylon-100) - (PP-200)	-1.2343	1.12	-1.099	0.9982
							(Nylon-100) - (PP-50)	-0.900055	1.18	-0.766	1
							(Nylon-200) - (Nylon-50)	0.655755	1.39	0.471	1
							(Nylon-200) - (PP-100)	-1.70187	1.24	-1.368	0.9854
							(Nylon-200) - (PP-200)	-2.92616	1.24	-2.36	0.5097
							(Nylon-200) - (PP-50)	-2.59191	1.29	-2.015	0.7585
							(Nylon-50) - (PP-100)	-2.35762	1.24	-1.896	0.8294
							(Nylon-50) - (PP-200)	-3.58191	1.24	-2.884	0.1844
							(Nylon-50) - (PP-50)	-3.24767	1.29	-2.522	0.3926
							(PP-100) - (PP-200)	-1.22429	1.06	-1.158	0.997
							(PP-100) - (PP-50)	-0.890041	1.11	-0.8	0.9999
							(PP-200) - (PP-50)	0.33425	1.1	0.303	1

## Sheet: Table S3a
Comparison	Estimate	Std. Error	z value	p-value
(Intercept)	2.70018	0.413064	6.537	6.28e-11
Control-Leachate	-0.270311	0.629805	-0.429	0.667779
HDPE-100	0.401912	0.639967	0.628	0.52999
HDPE-200	0.32982	0.626934	0.526	0.59883
HDPE-50	0.269801	0.705239	0.383	0.702041
LDPE-100	-0.009279	0.617457	-0.015	0.988011
LDPE-200	0.802481	0.640026	1.254	0.209905
LDPE-50	-0.012853	0.654959	-0.02	0.984343
Nylon-100	-0.065226	0.630775	-0.103	0.91764
Nylon-200	0.045204	0.575191	0.079	0.937359
Nylon-50	0.002165	0.559633	0.004	0.996914
PP-100	-0.083105	0.600052	-0.138	0.889849
PP-200	-0.38924	0.637952	-0.61	0.541769
PP-50	-0.398447	0.589172	-0.676	0.498862
Day	-0.422352	0.126153	-3.348	0.000814
Control-Leachate : Day	0.20824	0.194941	1.068	0.285421
HDPE-100 : Day	-0.500725	0.209441	-2.391	0.016813
HDPE-200 : Day	-0.202765	0.193708	-1.047	0.295212
HDPE-50 : Day	-0.053992	0.224282	-0.241	0.809763
LDPE-100 : Day	-0.245472	0.197309	-1.244	0.213463
LDPE-200 : Day	-0.56075	0.203499	-2.756	0.005859
LDPE-50 : Day	-0.191899	0.202736	-0.947	0.343869
Nylon-100 : Day	-0.039298	0.20026	-0.196	0.844428
Nylon-200 : Day	-0.061418	0.179385	-0.342	0.732062
Nylon-50 : Day	0.009929	0.173482	0.057	0.95436
PP-100 : Day	0.019409	0.188921	0.103	0.918173
PP-200 : Day	0.192531	0.206774	0.931	0.351794
PP-50 : Day	0.230994	0.181628	1.272	0.203445

## Sheet: Table S3b
Day	Contrasts	Estimate	SE	z ratio	p-value				Day.of.experiment = 0:
0	(Control-Fresh) - (Control-Leachate)	0.01737	0.426	0.041	1				contrast	estimate	SE	df	z.ratio	p.value
	(Control-Fresh) - (HDPE-100)	0.20837	0.426	0.489	1				(Control-Fresh) - (Control-Leachate)	0.270311	0.63	Inf	0.429	1
	(Control-Fresh) - (HDPE-200)	-0.07661	0.422	-0.182	1				(Control-Fresh) - (HDPE-100)	-0.401912	0.64	Inf	-0.628	1
	(Control-Fresh) - (HDPE-50)	-0.21749	0.467	-0.466	1				(Control-Fresh) - (HDPE-200)	-0.32982	0.627	Inf	-0.526	1
	(Control-Fresh) - (LDPE-100)	0.32791	0.417	0.787	1				(Control-Fresh) - (HDPE-50)	-0.269801	0.705	Inf	-0.383	1
	(Control-Fresh) - (LDPE-200)	-0.09257	0.423	-0.219	1				(Control-Fresh) - (LDPE-100)	0.009279	0.617	Inf	0.015	1
	(Control-Fresh) - (LDPE-50)	0.25323	0.446	0.568	1				(Control-Fresh) - (LDPE-200)	-0.802481	0.64	Inf	-1.254	0.9935
	(Control-Fresh) - (Nylon-100)	0.12059	0.426	0.283	1				(Control-Fresh) - (LDPE-50)	0.012853	0.655	Inf	0.02	1
	(Control-Fresh) - (Nylon-200)	0.03317	0.388	0.086	1				(Control-Fresh) - (Nylon-100)	0.065226	0.631	Inf	0.103	1
	(Control-Fresh) - (Nylon-50)	-0.00698	0.378	-0.018	1				(Control-Fresh) - (Nylon-200)	-0.045204	0.575	Inf	-0.079	1
	(Control-Fresh) - (PP-100)	0.06782	0.404	0.168	1				(Control-Fresh) - (Nylon-50)	-0.002165	0.56	Inf	-0.004	1
	(Control-Fresh) - (PP-200)	0.1657	0.433	0.383	1				(Control-Fresh) - (PP-100)	0.083105	0.6	Inf	0.138	1
	(Control-Fresh) - (PP-50)	0.13255	0.402	0.33	1				(Control-Fresh) - (PP-200)	0.38924	0.638	Inf	0.61	1
	(Control-Leachate) - (HDPE-100)	0.191	0.463	0.413	1				(Control-Fresh) - (PP-50)	0.398447	0.589	Inf	0.676	1
	(Control-Leachate) - (HDPE-200)	-0.09398	0.459	-0.205	1				(Control-Leachate) - (HDPE-100)	-0.672223	0.695	Inf	-0.967	0.9995
	(Control-Leachate) - (HDPE-50)	-0.23486	0.5	-0.469	1				(Control-Leachate) - (HDPE-200)	-0.600131	0.684	Inf	-0.878	0.9998
	(Control-Leachate) - (LDPE-100)	0.31054	0.455	0.682	1				(Control-Leachate) - (HDPE-50)	-0.540112	0.756	Inf	-0.715	1
	(Control-Leachate) - (LDPE-200)	-0.10994	0.46	-0.239	1				(Control-Leachate) - (LDPE-100)	-0.261033	0.675	Inf	-0.387	1
	(Control-Leachate) - (LDPE-50)	0.23586	0.48	0.491	1				(Control-Leachate) - (LDPE-200)	-1.07279	0.696	Inf	-1.541	0.9602
	(Control-Leachate) - (Nylon-100)	0.10322	0.464	0.222	1				(Control-Leachate) - (LDPE-50)	-0.257458	0.709	Inf	-0.363	1
	(Control-Leachate) - (Nylon-200)	0.0158	0.433	0.036	1				(Control-Leachate) - (Nylon-100)	-0.205085	0.688	Inf	-0.298	1
	(Control-Leachate) - (Nylon-50)	-0.02435	0.424	-0.057	1				(Control-Leachate) - (Nylon-200)	-0.315516	0.64	Inf	-0.493	1
	(Control-Leachate) - (PP-100)	0.05045	0.444	0.114	1				(Control-Leachate) - (Nylon-50)	-0.272476	0.626	Inf	-0.435	1
	(Control-Leachate) - (PP-200)	0.14833	0.471	0.315	1				(Control-Leachate) - (PP-100)	-0.187206	0.659	Inf	-0.284	1
	(Control-Leachate) - (PP-50)	0.11518	0.443	0.26	1				(Control-Leachate) - (PP-200)	0.118929	0.694	Inf	0.171	1
	(HDPE-100) - (HDPE-200)	-0.28498	0.459	-0.621	1				(Control-Leachate) - (PP-50)	0.128135	0.651	Inf	0.197	1
	(HDPE-100) - (HDPE-50)	-0.42586	0.5	-0.851	0.9999				(HDPE-100) - (HDPE-200)	0.072092	0.693	Inf	0.104	1
	(HDPE-100) - (LDPE-100)	0.11954	0.455	0.263	1				(HDPE-100) - (HDPE-50)	0.132111	0.764	Inf	0.173	1
	(HDPE-100) - (Nylon-100)	-0.08778	0.464	-0.189	1				(HDPE-100) - (LDPE-100)	0.411191	0.684	Inf	0.601	1
	(HDPE-100) - (PP-100)	-0.14054	0.444	-0.317	1				(HDPE-100) - (LDPE-200)	-0.400569	0.704	Inf	-0.569	1
	(HDPE-200) - (HDPE-50)	-0.14088	0.496	-0.284	1				(HDPE-100) - (LDPE-50)	0.414765	0.718	Inf	0.578	1
	(HDPE-200) - (LDPE-200)	-0.01596	0.457	-0.035	1				(HDPE-100) - (Nylon-100)	0.467139	0.697	Inf	0.67	1
	(HDPE-200) - (Nylon-200)	0.10978	0.429	0.256	1				(HDPE-100) - (Nylon-200)	0.356708	0.65	Inf	0.549	1
	(HDPE-200) - (PP-200)	0.24231	0.466	0.52	1				(HDPE-100) - (Nylon-50)	0.399748	0.636	Inf	0.628	1
	(HDPE-50) - (LDPE-50)	0.47072	0.515	0.914	0.9998				(HDPE-100) - (PP-100)	0.485017	0.669	Inf	0.725	1
	(HDPE-50) - (Nylon-50)	0.21052	0.465	0.453	1				(HDPE-100) - (PP-200)	0.791152	0.704	Inf	1.124	0.9978
	(HDPE-50) - (PP-50)	0.35004	0.482	0.726	1				(HDPE-100) - (PP-50)	0.800359	0.661	Inf	1.21	0.9953
	(LDPE-100) - (LDPE-200)	-0.42048	0.453	-0.928	0.9997				(HDPE-200) - (HDPE-50)	0.060019	0.753	Inf	0.08	1
	(LDPE-100) - (LDPE-50)	-0.07468	0.471	-0.158	1				(HDPE-200) - (LDPE-100)	0.339099	0.673	Inf	0.504	1
	(LDPE-100) - (Nylon-100)	-0.20732	0.456	-0.454	1				(HDPE-200) - (LDPE-200)	-0.472661	0.693	Inf	-0.682	1
	(LDPE-100) - (PP-100)	-0.26008	0.436	-0.596	1				(HDPE-200) - (LDPE-50)	0.342673	0.706	Inf	0.485	1
	(LDPE-200) - (LDPE-50)	0.3458	0.478	0.723	1				(HDPE-200) - (Nylon-100)	0.395047	0.683	Inf	0.578	1
	(LDPE-200) - (Nylon-200)	0.12574	0.431	0.292	1				(HDPE-200) - (Nylon-200)	0.284616	0.637	Inf	0.447	1
	(LDPE-200) - (PP-200)	0.25828	0.469	0.551	1				(HDPE-200) - (Nylon-50)	0.327656	0.621	Inf	0.528	1
	(LDPE-50) - (Nylon-50)	-0.26021	0.444	-0.586	1				(HDPE-200) - (PP-100)	0.412925	0.657	Inf	0.629	1
	(LDPE-50) - (PP-50)	-0.12068	0.461	-0.262	1				(HDPE-200) - (PP-200)	0.71906	0.692	Inf	1.04	0.999
	(Nylon-100) - (Nylon-200)	-0.08741	0.433	-0.202	1				(HDPE-200) - (PP-50)	0.728267	0.647	Inf	1.126	0.9977
	(Nylon-100) - (Nylon-50)	-0.12756	0.421	-0.303	1				(HDPE-50) - (LDPE-100)	0.27908	0.746	Inf	0.374	1
	(Nylon-100) - (PP-100)	-0.05276	0.444	-0.119	1				(HDPE-50) - (LDPE-200)	-0.53268	0.764	Inf	-0.697	1
	(Nylon-200) - (Nylon-50)	-0.04015	0.385	-0.104	1				(HDPE-50) - (LDPE-50)	0.282654	0.776	Inf	0.364	1
	(Nylon-200) - (PP-200)	0.13253	0.439	0.302	1				(HDPE-50) - (Nylon-100)	0.335027	0.757	Inf	0.443	1
	(Nylon-50) - (PP-50)	0.13952	0.396	0.352	1				(HDPE-50) - (Nylon-200)	0.224597	0.715	Inf	0.314	1
	(PP-100) - (PP-200)	0.09788	0.452	0.217	1				(HDPE-50) - (Nylon-50)	0.267636	0.701	Inf	0.382	1
	(PP-100) - (PP-50)	0.06472	0.422	0.153	1				(HDPE-50) - (PP-100)	0.352906	0.732	Inf	0.482	1
	(PP-200) - (PP-50)	-0.03316	0.449	-0.074	1				(HDPE-50) - (PP-200)	0.659041	0.763	Inf	0.864	0.9999
1	(Control-Fresh) - (Control-Leachate)	-0.10095	0.35	-0.288	1				(HDPE-50) - (PP-50)	0.668248	0.724	Inf	0.923	0.9997
	(Control-Fresh) - (HDPE-100)	0.48748	0.353	1.382	0.9841				(LDPE-100) - (LDPE-200)	-0.811759	0.686	Inf	-1.183	0.9963
	(Control-Fresh) - (HDPE-200)	0.03841	0.349	0.11	1				(LDPE-100) - (LDPE-50)	0.003575	0.698	Inf	0.005	1
	(Control-Fresh) - (HDPE-50)	-0.18094	0.382	-0.473	1				(LDPE-100) - (Nylon-100)	0.055948	0.677	Inf	0.083	1
	(Control-Fresh) - (LDPE-100)	0.45798	0.347	1.321	0.9894				(LDPE-100) - (Nylon-200)	-0.054483	0.63	Inf	-0.087	1
	(Control-Fresh) - (LDPE-200)	0.21841	0.35	0.623	1				(LDPE-100) - (Nylon-50)	-0.011443	0.614	Inf	-0.019	1
	(Control-Fresh) - (LDPE-50)	0.35192	0.37	0.95	0.9996				(LDPE-100) - (PP-100)	0.073826	0.649	Inf	0.114	1
	(Control-Fresh) - (Nylon-100)	0.14262	0.353	0.404	1				(LDPE-100) - (PP-200)	0.379961	0.683	Inf	0.556	1
	(Control-Fresh) - (Nylon-200)	0.06337	0.32	0.198	1				(LDPE-100) - (PP-50)	0.389168	0.64	Inf	0.608	1
	(Control-Fresh) - (Nylon-50)	-0.01412	0.312	-0.045	1				(LDPE-200) - (LDPE-50)	0.815334	0.719	Inf	1.135	0.9975
	(Control-Fresh) - (PP-100)	0.05404	0.333	0.162	1				(LDPE-200) - (Nylon-100)	0.867707	0.697	Inf	1.244	0.9939
	(Control-Fresh) - (PP-200)	0.05053	0.358	0.141	1				(LDPE-200) - (Nylon-200)	0.757277	0.649	Inf	1.166	0.9968
	(Control-Fresh) - (PP-50)	-0.00349	0.332	-0.011	1				(LDPE-200) - (Nylon-50)	0.800316	0.635	Inf	1.26	0.9932
	(Control-Leachate) - (HDPE-100)	0.58842	0.381	1.545	0.9593				(LDPE-200) - (PP-100)	0.885586	0.67	Inf	1.323	0.9893
	(Control-Leachate) - (HDPE-200)	0.13936	0.378	0.369	1				(LDPE-200) - (PP-200)	1.19172	0.705	Inf	1.691	0.9197
	(Control-Leachate) - (HDPE-50)	-0.07999	0.407	-0.196	1				(LDPE-200) - (PP-50)	1.20093	0.661	Inf	1.816	0.8694
	(Control-Leachate) - (LDPE-100)	0.55892	0.377	1.483	0.9708				(LDPE-50) - (Nylon-100)	0.052373	0.71	Inf	0.074	1
	(Control-Leachate) - (LDPE-200)	0.31936	0.378	0.844	0.9999				(LDPE-50) - (Nylon-200)	-0.058057	0.666	Inf	-0.087	1
	(Control-Leachate) - (LDPE-50)	0.45287	0.396	1.143	0.9974				(LDPE-50) - (Nylon-50)	-0.015018	0.651	Inf	-0.023	1
	(Control-Leachate) - (Nylon-100)	0.24357	0.382	0.637	1				(LDPE-50) - (PP-100)	0.070252	0.684	Inf	0.103	1
	(Control-Leachate) - (Nylon-200)	0.16432	0.357	0.461	1				(LDPE-50) - (PP-200)	0.376387	0.716	Inf	0.525	1
	(Control-Leachate) - (Nylon-50)	0.08683	0.349	0.249	1				(LDPE-50) - (PP-50)	0.385594	0.675	Inf	0.571	1
	(Control-Leachate) - (PP-100)	0.15499	0.364	0.426	1				(Nylon-100) - (Nylon-200)	-0.110431	0.641	Inf	-0.172	1
	(Control-Leachate) - (PP-200)	0.15148	0.389	0.39	1				(Nylon-100) - (Nylon-50)	-0.067391	0.624	Inf	-0.108	1
	(Control-Leachate) - (PP-50)	0.09746	0.365	0.267	1				(Nylon-100) - (PP-100)	0.017878	0.66	Inf	0.027	1
	(HDPE-100) - (HDPE-200)	-0.44907	0.379	-1.184	0.9963				(Nylon-100) - (PP-200)	0.324014	0.695	Inf	0.466	1
	(HDPE-100) - (HDPE-50)	-0.66842	0.409	-1.633	0.9377				(Nylon-100) - (PP-50)	0.33322	0.65	Inf	0.513	1
	(HDPE-100) - (LDPE-100)	-0.0295	0.378	-0.078	1				(Nylon-200) - (Nylon-50)	0.04304	0.569	Inf	0.076	1
	(HDPE-100) - (Nylon-100)	-0.34486	0.385	-0.897	0.9998				(Nylon-200) - (PP-100)	0.128309	0.61	Inf	0.21	1
	(HDPE-100) - (PP-100)	-0.43344	0.366	-1.184	0.9962				(Nylon-200) - (PP-200)	0.434444	0.648	Inf	0.671	1
	(HDPE-200) - (HDPE-50)	-0.21935	0.405	-0.542	1				(Nylon-200) - (PP-50)	0.443651	0.599	Inf	0.741	1
	(HDPE-200) - (LDPE-200)	0.18	0.377	0.477	1				(Nylon-50) - (PP-100)	0.085269	0.594	Inf	0.144	1
	(HDPE-200) - (Nylon-200)	0.02497	0.354	0.07	1				(Nylon-50) - (PP-200)	0.391405	0.633	Inf	0.618	1
	(HDPE-200) - (PP-200)	0.01212	0.386	0.031	1				(Nylon-50) - (PP-50)	0.400611	0.581	Inf	0.689	1
	(HDPE-50) - (LDPE-50)	0.53286	0.421	1.265	0.9929				(PP-100) - (PP-200)	0.306135	0.668	Inf	0.458	1
	(HDPE-50) - (Nylon-50)	0.16682	0.38	0.439	1				(PP-100) - (PP-50)	0.315342	0.621	Inf	0.508	1
	(HDPE-50) - (PP-50)	0.17745	0.394	0.451	1				(PP-200) - (PP-50)	0.009207	0.658	Inf	0.014	1
	(LDPE-100) - (LDPE-200)	-0.23957	0.376	-0.638	1
	(LDPE-100) - (LDPE-50)	-0.10605	0.391	-0.271	1				Day.of.experiment = 1:
	(LDPE-100) - (Nylon-100)	-0.31536	0.379	-0.832	0.9999				contrast	estimate	SE	df	z.ratio	p.value
	(LDPE-100) - (PP-100)	-0.40394	0.362	-1.117	0.9979				(Control-Fresh) - (Control-Leachate)	0.062071	0.462	Inf	0.134	1
	(LDPE-200) - (LDPE-50)	0.13351	0.395	0.338	1				(Control-Fresh) - (HDPE-100)	0.098813	0.465	Inf	0.213	1
	(LDPE-200) - (Nylon-200)	-0.15504	0.357	-0.434	1				(Control-Fresh) - (HDPE-200)	-0.127056	0.461	Inf	-0.276	1
	(LDPE-200) - (PP-200)	-0.16788	0.389	-0.431	1				(Control-Fresh) - (HDPE-50)	-0.215809	0.512	Inf	-0.422	1
	(LDPE-50) - (Nylon-50)	-0.36604	0.368	-0.994	0.9994				(Control-Fresh) - (LDPE-100)	0.254751	0.452	Inf	0.563	1
	(LDPE-50) - (PP-50)	-0.35541	0.382	-0.93	0.9997				(Control-Fresh) - (LDPE-200)	-0.24173	0.467	Inf	-0.517	1
	(Nylon-100) - (Nylon-200)	-0.07925	0.359	-0.221	1				(Control-Fresh) - (LDPE-50)	0.204752	0.483	Inf	0.424	1
	(Nylon-100) - (Nylon-50)	-0.15674	0.348	-0.451	1				(Control-Fresh) - (Nylon-100)	0.104524	0.462	Inf	0.226	1
	(Nylon-100) - (PP-100)	-0.08858	0.365	-0.242	1				(Control-Fresh) - (Nylon-200)	0.016214	0.422	Inf	0.038	1
	(Nylon-200) - (Nylon-50)	-0.07749	0.318	-0.244	1				(Control-Fresh) - (Nylon-50)	-0.012093	0.411	Inf	-0.029	1
	(Nylon-200) - (PP-200)	-0.01284	0.363	-0.035	1				(Control-Fresh) - (PP-100)	0.063696	0.439	Inf	0.145	1
	(Nylon-50) - (PP-50)	0.01063	0.327	0.032	1				(Control-Fresh) - (PP-200)	0.196709	0.465	Inf	0.423	1
	(PP-100) - (PP-200)	-0.00351	0.374	-0.009	1				(Control-Fresh) - (PP-50)	0.167452	0.434	Inf	0.386	1
	(PP-100) - (PP-50)	-0.05753	0.348	-0.166	1				(Control-Leachate) - (HDPE-100)	0.036741	0.505	Inf	0.073	1
	(PP-200) - (PP-50)	-0.05402	0.371	-0.146	1				(Control-Leachate) - (HDPE-200)	-0.189127	0.502	Inf	-0.377	1
3	(Control-Fresh) - (Control-Leachate)	-0.33758	0.274	-1.231	0.9945				(Control-Leachate) - (HDPE-50)	-0.277881	0.548	Inf	-0.507	1
	(Control-Fresh) - (HDPE-100)	1.0457	0.306	3.423	0.0401				(Control-Leachate) - (LDPE-100)	0.19268	0.494	Inf	0.39	1
	(Control-Fresh) - (HDPE-200)	0.26845	0.279	0.963	0.9996				(Control-Leachate) - (LDPE-200)	-0.303802	0.507	Inf	-0.599	1
	(Control-Fresh) - (HDPE-50)	-0.10784	0.305	-0.353	1				(Control-Leachate) - (LDPE-50)	0.142681	0.521	Inf	0.274	1
	(Control-Fresh) - (LDPE-100)	0.71812	0.293	2.449	0.444				(Control-Leachate) - (Nylon-100)	0.042453	0.503	Inf	0.084	1
	(Control-Fresh) - (LDPE-200)	0.84038	0.293	2.868	0.1913				(Control-Leachate) - (Nylon-200)	-0.045857	0.47	Inf	-0.097	1
	(Control-Fresh) - (LDPE-50)	0.54931	0.3	1.83	0.8626				(Control-Leachate) - (Nylon-50)	-0.074165	0.46	Inf	-0.161	1
	(Control-Fresh) - (Nylon-100)	0.18669	0.292	0.64	1				(Control-Leachate) - (PP-100)	0.001624	0.482	Inf	0.003	1
	(Control-Fresh) - (Nylon-200)	0.12378	0.256	0.484	1				(Control-Leachate) - (PP-200)	0.134638	0.507	Inf	0.266	1
	(Control-Fresh) - (Nylon-50)	-0.0284	0.247	-0.115	1				(Control-Leachate) - (PP-50)	0.105381	0.479	Inf	0.22	1
	(Control-Fresh) - (PP-100)	0.02648	0.269	0.098	1				(HDPE-100) - (HDPE-200)	-0.225869	0.505	Inf	-0.448	1
	(Control-Fresh) - (PP-200)	-0.17981	0.302	-0.596	1				(HDPE-100) - (HDPE-50)	-0.314622	0.55	Inf	-0.572	1
	(Control-Fresh) - (PP-50)	-0.27556	0.263	-1.047	0.9989				(HDPE-100) - (LDPE-100)	0.155938	0.497	Inf	0.314	1
	(Control-Leachate) - (HDPE-100)	1.38328	0.319	4.333	0.0012				(HDPE-100) - (LDPE-200)	-0.340543	0.51	Inf	-0.668	1
	(Control-Leachate) - (HDPE-200)	0.60603	0.293	2.066	0.725				(HDPE-100) - (LDPE-50)	0.10594	0.524	Inf	0.202	1
	(Control-Leachate) - (HDPE-50)	0.22974	0.316	0.726	1				(HDPE-100) - (Nylon-100)	0.005711	0.506	Inf	0.011	1
	(Control-Leachate) - (LDPE-100)	1.0557	0.309	3.415	0.0412				(HDPE-100) - (Nylon-200)	-0.082599	0.473	Inf	-0.174	1
	(Control-Leachate) - (LDPE-200)	1.17796	0.305	3.859	0.0086				(HDPE-100) - (Nylon-50)	-0.110906	0.463	Inf	-0.239	1
	(Control-Leachate) - (LDPE-50)	0.88689	0.312	2.844	0.2024				(HDPE-100) - (PP-100)	-0.035117	0.485	Inf	-0.072	1
	(Control-Leachate) - (Nylon-100)	0.52427	0.306	1.711	0.9125				(HDPE-100) - (PP-200)	0.097896	0.51	Inf	0.192	1
	(Control-Leachate) - (Nylon-200)	0.46136	0.278	1.659	0.93				(HDPE-100) - (PP-50)	0.06864	0.482	Inf	0.142	1
	(Control-Leachate) - (Nylon-50)	0.30918	0.269	1.151	0.9972				(HDPE-200) - (HDPE-50)	-0.088754	0.547	Inf	-0.162	1
	(Control-Leachate) - (PP-100)	0.36406	0.284	1.282	0.992				(HDPE-200) - (LDPE-100)	0.381807	0.493	Inf	0.774	1
	(Control-Leachate) - (PP-200)	0.15777	0.319	0.494	1				(HDPE-200) - (LDPE-200)	-0.114675	0.507	Inf	-0.226	1
	(Control-Leachate) - (PP-50)	0.06202	0.281	0.221	1				(HDPE-200) - (LDPE-50)	0.331808	0.52	Inf	0.638	1
	(HDPE-100) - (HDPE-200)	-0.77725	0.32	-2.431	0.4577				(HDPE-200) - (Nylon-100)	0.23158	0.5	Inf	0.463	1
	(HDPE-100) - (HDPE-50)	-1.15354	0.343	-3.362	0.0487				(HDPE-200) - (Nylon-200)	0.14327	0.469	Inf	0.305	1
	(HDPE-100) - (LDPE-100)	-0.32758	0.333	-0.985	0.9994				(HDPE-200) - (Nylon-50)	0.114962	0.457	Inf	0.251	1
	(HDPE-100) - (Nylon-100)	-0.85901	0.334	-2.57	0.3599				(HDPE-200) - (PP-100)	0.190751	0.481	Inf	0.397	1
	(HDPE-100) - (PP-100)	-1.01922	0.314	-3.242	0.0704				(HDPE-200) - (PP-200)	0.323765	0.505	Inf	0.641	1
	(HDPE-200) - (HDPE-50)	-0.37628	0.316	-1.19	0.9961				(HDPE-200) - (PP-50)	0.294508	0.476	Inf	0.618	1
	(HDPE-200) - (LDPE-200)	0.57193	0.306	1.867	0.8444				(HDPE-50) - (LDPE-100)	0.47056	0.54	Inf	0.872	0.9999
	(HDPE-200) - (Nylon-200)	-0.14467	0.279	-0.518	1				(HDPE-50) - (LDPE-200)	-0.025921	0.553	Inf	-0.047	1
	(HDPE-200) - (PP-200)	-0.44825	0.321	-1.396	0.9826				(HDPE-50) - (LDPE-50)	0.420562	0.564	Inf	0.746	1
	(HDPE-50) - (LDPE-50)	0.65714	0.332	1.979	0.7811				(HDPE-50) - (Nylon-100)	0.320333	0.548	Inf	0.584	1
	(HDPE-50) - (Nylon-50)	0.07943	0.298	0.267	1				(HDPE-50) - (Nylon-200)	0.232024	0.52	Inf	0.446	1
	(HDPE-50) - (PP-50)	-0.16772	0.307	-0.546	1				(HDPE-50) - (Nylon-50)	0.203716	0.51	Inf	0.399	1
	(LDPE-100) - (LDPE-200)	0.12226	0.318	0.385	1				(HDPE-50) - (PP-100)	0.279505	0.53	Inf	0.527	1
	(LDPE-100) - (LDPE-50)	-0.16881	0.323	-0.522	1				(HDPE-50) - (PP-200)	0.412519	0.552	Inf	0.748	1
	(LDPE-100) - (Nylon-100)	-0.53143	0.322	-1.65	0.9326				(HDPE-50) - (PP-50)	0.383262	0.527	Inf	0.728	1
	(LDPE-100) - (PP-100)	-0.69164	0.303	-2.281	0.5691				(LDPE-100) - (LDPE-200)	-0.496481	0.5	Inf	-0.992	0.9994
	(LDPE-200) - (LDPE-50)	-0.29107	0.322	-0.904	0.9998				(LDPE-100) - (LDPE-50)	-0.049999	0.512	Inf	-0.098	1
	(LDPE-200) - (Nylon-200)	-0.7166	0.295	-2.429	0.4591				(LDPE-100) - (Nylon-100)	-0.150227	0.495	Inf	-0.303	1
	(LDPE-200) - (PP-200)	-1.02019	0.337	-3.025	0.1294				(LDPE-100) - (Nylon-200)	-0.238537	0.463	Inf	-0.515	1
	(LDPE-50) - (Nylon-50)	-0.57771	0.293	-1.974	0.7845				(LDPE-100) - (Nylon-50)	-0.266844	0.452	Inf	-0.591	1
	(LDPE-50) - (PP-50)	-0.82487	0.302	-2.728	0.2626				(LDPE-100) - (PP-100)	-0.191055	0.474	Inf	-0.403	1
	(Nylon-100) - (Nylon-200)	-0.06291	0.293	-0.215	1				(LDPE-100) - (PP-200)	-0.058042	0.499	Inf	-0.116	1
	(Nylon-100) - (Nylon-50)	-0.21509	0.282	-0.764	1				(LDPE-100) - (PP-50)	-0.087298	0.471	Inf	-0.185	1
	(Nylon-100) - (PP-100)	-0.16021	0.299	-0.536	1				(LDPE-200) - (LDPE-50)	0.446483	0.526	Inf	0.848	0.9999
	(Nylon-200) - (Nylon-50)	-0.15218	0.251	-0.607	1				(LDPE-200) - (Nylon-100)	0.346255	0.509	Inf	0.681	1
	(Nylon-200) - (PP-200)	-0.30359	0.303	-1.001	0.9993				(LDPE-200) - (Nylon-200)	0.257945	0.476	Inf	0.542	1
	(Nylon-50) - (PP-50)	-0.24716	0.254	-0.973	0.9995				(LDPE-200) - (Nylon-50)	0.229637	0.465	Inf	0.493	1
	(PP-100) - (PP-200)	-0.20628	0.315	-0.654	1				(LDPE-200) - (PP-100)	0.305426	0.488	Inf	0.626	1
	(PP-100) - (PP-50)	-0.30204	0.274	-1.102	0.9982				(LDPE-200) - (PP-200)	0.43844	0.512	Inf	0.856	0.9999
	(PP-200) - (PP-50)	-0.09575	0.307	-0.312	1				(LDPE-200) - (PP-50)	0.409183	0.485	Inf	0.844	0.9999
5	(Control-Fresh) - (Control-Leachate)	-0.57421	0.348	-1.65	0.9326				(LDPE-50) - (Nylon-100)	-0.100228	0.522	Inf	-0.192	1
	(Control-Fresh) - (HDPE-100)	1.60392	0.415	3.86	0.0085				(LDPE-50) - (Nylon-200)	-0.188538	0.492	Inf	-0.383	1
	(Control-Fresh) - (HDPE-200)	0.49848	0.353	1.41	0.981				(LDPE-50) - (Nylon-50)	-0.216846	0.481	Inf	-0.45	1
	(Control-Fresh) - (HDPE-50)	-0.03474	0.403	-0.086	1				(LDPE-50) - (PP-100)	-0.141057	0.502	Inf	-0.281	1
	(Control-Fresh) - (LDPE-100)	0.97826	0.386	2.536	0.3828				(LDPE-50) - (PP-200)	-0.008043	0.525	Inf	-0.015	1
	(Control-Fresh) - (LDPE-200)	1.46235	0.386	3.786	0.0113				(LDPE-50) - (PP-50)	-0.0373	0.499	Inf	-0.075	1
	(Control-Fresh) - (LDPE-50)	0.74669	0.38	1.964	0.7903				(Nylon-100) - (Nylon-200)	-0.08831	0.47	Inf	-0.188	1
	(Control-Fresh) - (Nylon-100)	0.23076	0.381	0.606	1				(Nylon-100) - (Nylon-50)	-0.116618	0.457	Inf	-0.255	1
	(Control-Fresh) - (Nylon-200)	0.18419	0.328	0.561	1				(Nylon-100) - (PP-100)	-0.040828	0.482	Inf	-0.085	1
	(Control-Fresh) - (Nylon-50)	-0.04269	0.314	-0.136	1				(Nylon-100) - (PP-200)	0.092185	0.506	Inf	0.182	1
	(Control-Fresh) - (PP-100)	-0.00109	0.349	-0.003	1				(Nylon-100) - (PP-50)	0.062928	0.477	Inf	0.132	1
	(Control-Fresh) - (PP-200)	-0.41015	0.402	-1.02	0.9992				(Nylon-200) - (Nylon-50)	-0.028308	0.419	Inf	-0.068	1
	(Control-Fresh) - (PP-50)	-0.54763	0.331	-1.654	0.9316				(Nylon-200) - (PP-100)	0.047482	0.447	Inf	0.106	1
	(Control-Leachate) - (HDPE-100)	2.17813	0.431	5.057	<.0001				(Nylon-200) - (PP-200)	0.180495	0.473	Inf	0.382	1
	(Control-Leachate) - (HDPE-200)	1.0727	0.369	2.905	0.1753				(Nylon-200) - (PP-50)	0.151238	0.442	Inf	0.342	1
	(Control-Leachate) - (HDPE-50)	0.53948	0.414	1.303	0.9906				(Nylon-50) - (PP-100)	0.075789	0.435	Inf	0.174	1
	(Control-Leachate) - (LDPE-100)	1.55247	0.402	3.858	0.0086				(Nylon-50) - (PP-200)	0.208803	0.462	Inf	0.452	1
	(Control-Leachate) - (LDPE-200)	2.03656	0.399	5.101	<.0001				(Nylon-50) - (PP-50)	0.179546	0.429	Inf	0.419	1
	(Control-Leachate) - (LDPE-50)	1.3209	0.393	3.358	0.0494				(PP-100) - (PP-200)	0.133014	0.487	Inf	0.273	1
	(Control-Leachate) - (Nylon-100)	0.80497	0.396	2.035	0.7456				(PP-100) - (PP-50)	0.103757	0.456	Inf	0.227	1
	(Control-Leachate) - (Nylon-200)	0.7584	0.349	2.17	0.6513				(PP-200) - (PP-50)	-0.029257	0.481	Inf	-0.061	1
	(Control-Leachate) - (Nylon-50)	0.53153	0.335	1.589	0.9494
	(Control-Leachate) - (PP-100)	0.57312	0.364	1.575	0.9527				Day.of.experiment = 3:
	(Control-Leachate) - (PP-200)	0.16407	0.42	0.391	1				contrast	estimate	SE	df	z.ratio	p.value
	(Control-Leachate) - (PP-50)	0.02658	0.348	0.076	1				(Control-Fresh) - (Control-Leachate)	-0.354408	0.273	Inf	-1.299	0.9909
	(HDPE-100) - (HDPE-200)	-1.10544	0.428	-2.58	0.3531				(Control-Fresh) - (HDPE-100)	1.10026	0.304	Inf	3.618	0.0208
	(HDPE-100) - (HDPE-50)	-1.63866	0.471	-3.476	0.0337				(Control-Fresh) - (HDPE-200)	0.278473	0.276	Inf	1.008	0.9993
	(HDPE-100) - (LDPE-100)	-0.62566	0.455	-1.375	0.9848				(Control-Fresh) - (HDPE-50)	-0.107826	0.305	Inf	-0.354	1
	(HDPE-100) - (Nylon-100)	-1.37316	0.456	-3.013	0.1335				(Control-Fresh) - (LDPE-100)	0.745696	0.291	Inf	2.56	0.3668
	(HDPE-100) - (PP-100)	-1.60501	0.429	-3.737	0.0135				(Control-Fresh) - (LDPE-200)	0.87977	0.29	Inf	3.032	0.1268
	(HDPE-200) - (HDPE-50)	-0.53322	0.413	-1.29	0.9915				(Control-Fresh) - (LDPE-50)	0.588551	0.298	Inf	1.976	0.7828
	(HDPE-200) - (LDPE-200)	0.96386	0.397	2.426	0.4607				(Control-Fresh) - (Nylon-100)	0.183119	0.291	Inf	0.629	1
	(HDPE-200) - (Nylon-200)	-0.3143	0.35	-0.899	0.9998				(Control-Fresh) - (Nylon-200)	0.139051	0.254	Inf	0.547	1
	(HDPE-200) - (PP-200)	-0.90863	0.423	-2.148	0.6674				(Control-Fresh) - (Nylon-50)	-0.031951	0.246	Inf	-0.13	1
	(HDPE-50) - (LDPE-50)	0.78143	0.433	1.803	0.8754				(Control-Fresh) - (PP-100)	0.024878	0.268	Inf	0.093	1
	(HDPE-50) - (Nylon-50)	-0.00795	0.387	-0.021	1				(Control-Fresh) - (PP-200)	-0.188352	0.303	Inf	-0.621	1
	(HDPE-50) - (PP-50)	-0.5129	0.398	-1.288	0.9916				(Control-Fresh) - (PP-50)	-0.294536	0.262	Inf	-1.125	0.9977
	(LDPE-100) - (LDPE-200)	0.48409	0.424	1.142	0.9974				(Control-Leachate) - (HDPE-100)	1.45467	0.318	Inf	4.577	0.0004
	(LDPE-100) - (LDPE-50)	-0.23157	0.421	-0.551	1				(Control-Leachate) - (HDPE-200)	0.632882	0.291	Inf	2.176	0.6472
	(LDPE-100) - (Nylon-100)	-0.7475	0.427	-1.75	0.8978				(Control-Leachate) - (HDPE-50)	0.246582	0.316	Inf	0.781	1
	(LDPE-100) - (PP-100)	-0.97935	0.4	-2.447	0.4458				(Control-Leachate) - (LDPE-100)	1.1001	0.307	Inf	3.579	0.0237
	(LDPE-200) - (LDPE-50)	-0.71566	0.417	-1.716	0.9108				(Control-Leachate) - (LDPE-200)	1.23418	0.302	Inf	4.081	0.0036
	(LDPE-200) - (Nylon-200)	-1.27816	0.384	-3.331	0.0536				(Control-Leachate) - (LDPE-50)	0.942959	0.31	Inf	3.046	0.1222
	(LDPE-200) - (PP-200)	-1.87249	0.456	-4.104	0.0032				(Control-Leachate) - (Nylon-100)	0.537528	0.306	Inf	1.759	0.8941
	(LDPE-50) - (Nylon-50)	-0.78938	0.365	-2.165	0.6553				(Control-Leachate) - (Nylon-200)	0.493459	0.276	Inf	1.785	0.8832
	(LDPE-50) - (PP-50)	-1.29432	0.377	-3.435	0.0386				(Control-Leachate) - (Nylon-50)	0.322457	0.267	Inf	1.209	0.9954
	(Nylon-100) - (Nylon-200)	-0.04657	0.378	-0.123	1				(Control-Leachate) - (PP-100)	0.379286	0.283	Inf	1.341	0.9878
	(Nylon-100) - (Nylon-50)	-0.27345	0.364	-0.751	1				(Control-Leachate) - (PP-200)	0.166056	0.321	Inf	0.518	1
	(Nylon-100) - (PP-100)	-0.23185	0.394	-0.589	1				(Control-Leachate) - (PP-50)	0.059872	0.279	Inf	0.214	1
	(Nylon-200) - (Nylon-50)	-0.22687	0.315	-0.721	1				(HDPE-100) - (HDPE-200)	-0.82179	0.317	Inf	-2.591	0.346
	(Nylon-200) - (PP-200)	-0.59433	0.402	-1.479	0.9714				(HDPE-100) - (HDPE-50)	-1.20809	0.342	Inf	-3.53	0.0281
	(Nylon-50) - (PP-50)	-0.50495	0.315	-1.605	0.9452				(HDPE-100) - (LDPE-100)	-0.354567	0.33	Inf	-1.073	0.9986
	(PP-100) - (PP-200)	-0.40906	0.421	-0.971	0.9995				(HDPE-100) - (LDPE-200)	-0.220493	0.326	Inf	-0.676	1
	(PP-100) - (PP-50)	-0.54654	0.347	-1.573	0.9531				(HDPE-100) - (LDPE-50)	-0.511712	0.333	Inf	-1.536	0.9612
	(PP-200) - (PP-50)	-0.13749	0.403	-0.341	1				(HDPE-100) - (Nylon-100)	-0.917144	0.333	Inf	-2.751	0.2498
7	(Control-Fresh) - (Control-Leachate)	-0.81085	0.51	-1.589	0.9493				(HDPE-100) - (Nylon-200)	-0.961212	0.305	Inf	-3.148	0.0925
	(Control-Fresh) - (HDPE-100)	2.16214	0.602	3.592	0.0227				(HDPE-100) - (Nylon-50)	-1.13221	0.298	Inf	-3.797	0.0108
	(Control-Fresh) - (HDPE-200)	0.72852	0.513	1.42	0.9799				(HDPE-100) - (PP-100)	-1.07539	0.313	Inf	-3.436	0.0385
	(Control-Fresh) - (HDPE-50)	0.03837	0.594	0.065	1				(HDPE-100) - (PP-200)	-1.28862	0.346	Inf	-3.726	0.0141
	(Control-Fresh) - (LDPE-100)	1.2384	0.556	2.229	0.6082				(HDPE-100) - (PP-50)	-1.3948	0.31	Inf	-4.5	0.0006
	(Control-Fresh) - (LDPE-200)	2.08431	0.559	3.727	0.0141				(HDPE-200) - (HDPE-50)	-0.3863	0.314	Inf	-1.229	0.9946
	(Control-Fresh) - (LDPE-50)	0.94407	0.548	1.722	0.9087				(HDPE-200) - (LDPE-100)	0.467222	0.305	Inf	1.534	0.9617
	(Control-Fresh) - (Nylon-100)	0.27483	0.552	0.498	1				(HDPE-200) - (LDPE-200)	0.601297	0.302	Inf	1.989	0.7752
	(Control-Fresh) - (Nylon-200)	0.24459	0.479	0.511	1				(HDPE-200) - (LDPE-50)	0.310078	0.307	Inf	1.009	0.9993
	(Control-Fresh) - (Nylon-50)	-0.05697	0.459	-0.124	1				(HDPE-200) - (Nylon-100)	-0.095354	0.302	Inf	-0.316	1
	(Control-Fresh) - (PP-100)	-0.02866	0.509	-0.056	1				(HDPE-200) - (Nylon-200)	-0.139422	0.276	Inf	-0.505	1
	(Control-Fresh) - (PP-200)	-0.64049	0.583	-1.099	0.9982				(HDPE-200) - (Nylon-50)	-0.310425	0.266	Inf	-1.168	0.9967
	(Control-Fresh) - (PP-50)	-0.81971	0.481	-1.703	0.9153				(HDPE-200) - (PP-100)	-0.253595	0.284	Inf	-0.894	0.9998
	(Control-Leachate) - (HDPE-100)	2.97299	0.629	4.726	0.0002				(HDPE-200) - (PP-200)	-0.466825	0.321	Inf	-1.453	0.9754
	(Control-Leachate) - (HDPE-200)	1.53937	0.542	2.841	0.2039				(HDPE-200) - (PP-50)	-0.573009	0.278	Inf	-2.063	0.7268
	(Control-Leachate) - (HDPE-50)	0.84921	0.616	1.378	0.9845				(HDPE-50) - (LDPE-100)	0.853522	0.328	Inf	2.6	0.3398
	(Control-Leachate) - (LDPE-100)	2.04924	0.584	3.509	0.0302				(HDPE-50) - (LDPE-200)	0.987597	0.326	Inf	3.027	0.1285
	(Control-Leachate) - (LDPE-200)	2.89516	0.585	4.952	0.0001				(HDPE-50) - (LDPE-50)	0.696377	0.33	Inf	2.108	0.6958
	(Control-Leachate) - (LDPE-50)	1.75492	0.574	3.057	0.1188				(HDPE-50) - (Nylon-100)	0.290946	0.329	Inf	0.885	0.9998
	(Control-Leachate) - (Nylon-100)	1.08567	0.578	1.879	0.8385				(HDPE-50) - (Nylon-200)	0.246877	0.304	Inf	0.811	0.9999
	(Control-Leachate) - (Nylon-200)	1.05544	0.511	2.064	0.7264				(HDPE-50) - (Nylon-50)	0.075875	0.297	Inf	0.256	1
	(Control-Leachate) - (Nylon-50)	0.75387	0.491	1.536	0.9611				(HDPE-50) - (PP-100)	0.132704	0.311	Inf	0.427	1
	(Control-Leachate) - (PP-100)	0.78219	0.536	1.459	0.9746				(HDPE-50) - (PP-200)	-0.080525	0.347	Inf	-0.232	1
	(Control-Leachate) - (PP-200)	0.17036	0.611	0.279	1				(HDPE-50) - (PP-50)	-0.186709	0.306	Inf	-0.61	1
	(Control-Leachate) - (PP-50)	-0.00886	0.51	-0.017	1				(LDPE-100) - (LDPE-200)	0.134075	0.315	Inf	0.426	1
	(HDPE-100) - (HDPE-200)	-1.43362	0.623	-2.302	0.5532				(LDPE-100) - (LDPE-50)	-0.157145	0.32	Inf	-0.49	1
	(HDPE-100) - (HDPE-50)	-2.12377	0.694	-3.062	0.1172				(LDPE-100) - (Nylon-100)	-0.562576	0.321	Inf	-1.754	0.8963
	(HDPE-100) - (LDPE-100)	-0.92375	0.657	-1.405	0.9816				(LDPE-100) - (Nylon-200)	-0.606645	0.295	Inf	-2.057	0.7313
	(HDPE-100) - (Nylon-100)	-1.88732	0.66	-2.858	0.1961				(LDPE-100) - (Nylon-50)	-0.777647	0.286	Inf	-2.721	0.2664
	(HDPE-100) - (PP-100)	-2.1908	0.625	-3.504	0.0307				(LDPE-100) - (PP-100)	-0.720818	0.301	Inf	-2.392	0.486
	(HDPE-200) - (HDPE-50)	-0.69015	0.613	-1.125	0.9977				(LDPE-100) - (PP-200)	-0.934047	0.339	Inf	-2.754	0.2482
	(HDPE-200) - (LDPE-200)	1.35579	0.578	2.345	0.5209				(LDPE-100) - (PP-50)	-1.04023	0.297	Inf	-3.497	0.0314
	(HDPE-200) - (Nylon-200)	-0.48393	0.509	-0.952	0.9996				(LDPE-200) - (LDPE-50)	-0.291219	0.318	Inf	-0.915	0.9997
	(HDPE-200) - (PP-200)	-1.36901	0.613	-2.232	0.6059				(LDPE-200) - (Nylon-100)	-0.696651	0.318	Inf	-2.189	0.6376
	(HDPE-50) - (LDPE-50)	0.90571	0.641	1.414	0.9806				(LDPE-200) - (Nylon-200)	-0.740719	0.292	Inf	-2.54	0.3803
	(HDPE-50) - (Nylon-50)	-0.09534	0.573	-0.166	1				(LDPE-200) - (Nylon-50)	-0.911722	0.284	Inf	-3.214	0.0764
	(HDPE-50) - (PP-50)	-0.85807	0.59	-1.455	0.9751				(LDPE-200) - (PP-100)	-0.854892	0.297	Inf	-2.88	0.1861
	(LDPE-100) - (LDPE-200)	0.84592	0.614	1.379	0.9844				(LDPE-200) - (PP-200)	-1.06812	0.337	Inf	-3.169	0.087
	(LDPE-100) - (LDPE-50)	-0.29432	0.608	-0.484	1				(LDPE-200) - (PP-50)	-1.17431	0.295	Inf	-3.978	0.0054
	(LDPE-100) - (Nylon-100)	-0.96357	0.616	-1.563	0.9554				(LDPE-50) - (Nylon-100)	-0.405432	0.323	Inf	-1.254	0.9935
	(LDPE-100) - (PP-100)	-1.26705	0.579	-2.187	0.639				(LDPE-50) - (Nylon-200)	-0.4495	0.298	Inf	-1.509	0.9664
	(LDPE-200) - (LDPE-50)	-1.14024	0.606	-1.882	0.8366				(LDPE-50) - (Nylon-50)	-0.620502	0.29	Inf	-2.141	0.6728
	(LDPE-200) - (Nylon-200)	-1.83972	0.555	-3.315	0.0564				(LDPE-50) - (PP-100)	-0.563673	0.304	Inf	-1.853	0.8518
	(LDPE-200) - (PP-200)	-2.7248	0.659	-4.134	0.0029				(LDPE-50) - (PP-200)	-0.776903	0.34	Inf	-2.284	0.5667
	(LDPE-50) - (Nylon-50)	-1.00105	0.527	-1.901	0.8267				(LDPE-50) - (PP-50)	-0.883087	0.3	Inf	-2.946	0.1585
	(LDPE-50) - (PP-50)	-1.76378	0.546	-3.232	0.0723				(Nylon-100) - (Nylon-200)	-0.044068	0.291	Inf	-0.151	1
	(Nylon-100) - (Nylon-200)	-0.03023	0.548	-0.055	1				(Nylon-100) - (Nylon-50)	-0.215071	0.28	Inf	-0.767	1
	(Nylon-100) - (Nylon-50)	-0.3318	0.53	-0.626	1				(Nylon-100) - (PP-100)	-0.158241	0.298	Inf	-0.53	1
	(Nylon-100) - (PP-100)	-0.30348	0.574	-0.528	1				(Nylon-100) - (PP-200)	-0.371471	0.335	Inf	-1.11	0.998
	(Nylon-100) - (PP-200)	-0.91531	0.647	-1.414	0.9805				(Nylon-100) - (PP-50)	-0.477655	0.292	Inf	-1.634	0.9375
	(Nylon-200) - (Nylon-50)	-0.30156	0.458	-0.658	1				(Nylon-200) - (Nylon-50)	-0.171002	0.249	Inf	-0.687	1
	(Nylon-200) - (PP-200)	-0.88508	0.583	-1.517	0.9648				(Nylon-200) - (PP-100)	-0.114173	0.27	Inf	-0.423	1
	(Nylon-50) - (PP-50)	-0.76273	0.458	-1.664	0.9285				(Nylon-200) - (PP-200)	-0.327403	0.304	Inf	-1.076	0.9986
	(PP-100) - (PP-200)	-0.61183	0.611	-1.001	0.9993				(Nylon-200) - (PP-50)	-0.433587	0.262	Inf	-1.654	0.9315
	(PP-100) - (PP-50)	-0.79105	0.508	-1.559	0.9564				(Nylon-50) - (PP-100)	0.056829	0.259	Inf	0.219	1
	(PP-200) - (PP-50)	-0.17922	0.585	-0.306	1				(Nylon-50) - (PP-200)	-0.156401	0.297	Inf	-0.526	1
									(Nylon-50) - (PP-50)	-0.262585	0.252	Inf	-1.041	0.999
									(PP-100) - (PP-200)	-0.21323	0.317	Inf	-0.673	1
									(PP-100) - (PP-50)	-0.319414	0.273	Inf	-1.172	0.9966
									(PP-200) - (PP-50)	-0.106184	0.308	Inf	-0.345	1
									Day.of.experiment = 5:
									contrast	estimate	SE	df	z.ratio	p.value
									(Control-Fresh) - (Control-Leachate)	-0.770888	0.49	Inf	-1.575	0.9528
									(Control-Fresh) - (HDPE-100)	2.10171	0.565	Inf	3.717	0.0146
									(Control-Fresh) - (HDPE-200)	0.684003	0.49	Inf	1.395	0.9827
									(Control-Fresh) - (HDPE-50)	0.000157	0.571	Inf	0	1
									(Control-Fresh) - (LDPE-100)	1.23664	0.526	Inf	2.351	0.5163
									(Control-Fresh) - (LDPE-200)	2.00127	0.53	Inf	3.773	0.0118
									(Control-Fresh) - (LDPE-50)	0.97235	0.522	Inf	1.862	0.8473
									(Control-Fresh) - (Nylon-100)	0.261715	0.526	Inf	0.497	1
									(Control-Fresh) - (Nylon-200)	0.261888	0.457	Inf	0.573	1
									(Control-Fresh) - (Nylon-50)	-0.051809	0.439	Inf	-0.118	1
									(Control-Fresh) - (PP-100)	-0.01394	0.486	Inf	-0.029	1
									(Control-Fresh) - (PP-200)	-0.573413	0.556	Inf	-1.031	0.9991
									(Control-Fresh) - (PP-50)	-0.756524	0.461	Inf	-1.64	0.9356
									(Control-Leachate) - (HDPE-100)	2.8726	0.593	Inf	4.843	0.0001
									(Control-Leachate) - (HDPE-200)	1.45489	0.519	Inf	2.802	0.2231
									(Control-Leachate) - (HDPE-50)	0.771044	0.594	Inf	1.298	0.9909
									(Control-Leachate) - (LDPE-100)	2.00753	0.555	Inf	3.617	0.0208
									(Control-Leachate) - (LDPE-200)	2.77216	0.557	Inf	4.981	0.0001
									(Control-Leachate) - (LDPE-50)	1.74324	0.549	Inf	3.177	0.0851
									(Control-Leachate) - (Nylon-100)	1.0326	0.553	Inf	1.867	0.8443
									(Control-Leachate) - (Nylon-200)	1.03278	0.491	Inf	2.104	0.6985
									(Control-Leachate) - (Nylon-50)	0.719079	0.472	Inf	1.524	0.9636
									(Control-Leachate) - (PP-100)	0.756948	0.514	Inf	1.474	0.9723
									(Control-Leachate) - (PP-200)	0.197475	0.585	Inf	0.338	1
									(Control-Leachate) - (PP-50)	0.014364	0.491	Inf	0.029	1
									(HDPE-100) - (HDPE-200)	-1.41771	0.585	Inf	-2.422	0.4636
									(HDPE-100) - (HDPE-50)	-2.10156	0.657	Inf	-3.197	0.0802
									(HDPE-100) - (LDPE-100)	-0.865073	0.615	Inf	-1.406	0.9814
									(HDPE-100) - (LDPE-200)	-0.100442	0.614	Inf	-0.164	1
									(HDPE-100) - (LDPE-50)	-1.12936	0.611	Inf	-1.849	0.8534
									(HDPE-100) - (Nylon-100)	-1.84	0.621	Inf	-2.961	0.1524
									(HDPE-100) - (Nylon-200)	-1.83983	0.563	Inf	-3.268	0.065
									(HDPE-100) - (Nylon-50)	-2.15352	0.55	Inf	-3.918	0.0068
									(HDPE-100) - (PP-100)	-2.11565	0.587	Inf	-3.602	0.0219
									(HDPE-100) - (PP-200)	-2.67513	0.648	Inf	-4.128	0.0029
									(HDPE-100) - (PP-50)	-2.85824	0.569	Inf	-5.024	<.0001
									(HDPE-200) - (HDPE-50)	-0.683846	0.589	Inf	-1.161	0.9969
									(HDPE-200) - (LDPE-100)	0.552638	0.548	Inf	1.009	0.9993
									(HDPE-200) - (LDPE-200)	1.31727	0.548	Inf	2.404	0.4772
									(HDPE-200) - (LDPE-50)	0.288347	0.542	Inf	0.532	1
									(HDPE-200) - (Nylon-100)	-0.422288	0.548	Inf	-0.771	1
									(HDPE-200) - (Nylon-200)	-0.422114	0.485	Inf	-0.87	0.9999
									(HDPE-200) - (Nylon-50)	-0.735812	0.468	Inf	-1.571	0.9537
									(HDPE-200) - (PP-100)	-0.697942	0.512	Inf	-1.363	0.9859
									(HDPE-200) - (PP-200)	-1.25742	0.585	Inf	-2.15	0.6665
									(HDPE-200) - (PP-50)	-1.44053	0.488	Inf	-2.95	0.1566
									(HDPE-50) - (LDPE-100)	1.23648	0.62	Inf	1.993	0.7725
									(HDPE-50) - (LDPE-200)	2.00111	0.619	Inf	3.231	0.0727
									(HDPE-50) - (LDPE-50)	0.972193	0.614	Inf	1.584	0.9505
									(HDPE-50) - (Nylon-100)	0.261558	0.619	Inf	0.423	1
									(HDPE-50) - (Nylon-200)	0.261731	0.566	Inf	0.463	1
									(HDPE-50) - (Nylon-50)	-0.051966	0.552	Inf	-0.094	1
									(HDPE-50) - (PP-100)	-0.014097	0.589	Inf	-0.024	1
									(HDPE-50) - (PP-200)	-0.57357	0.657	Inf	-0.874	0.9998
									(HDPE-50) - (PP-50)	-0.756681	0.568	Inf	-1.333	0.9885
									(LDPE-100) - (LDPE-200)	0.764631	0.578	Inf	1.323	0.9892
									(LDPE-100) - (LDPE-50)	-0.264291	0.574	Inf	-0.46	1
									(LDPE-100) - (Nylon-100)	-0.974926	0.584	Inf	-1.671	0.9263
									(LDPE-100) - (Nylon-200)	-0.974752	0.524	Inf	-1.86	0.8481
									(LDPE-100) - (Nylon-50)	-1.28845	0.509	Inf	-2.533	0.3849
									(LDPE-100) - (PP-100)	-1.25058	0.548	Inf	-2.282	0.5683
									(LDPE-100) - (PP-200)	-1.81005	0.619	Inf	-2.925	0.1669
									(LDPE-100) - (PP-50)	-1.99316	0.527	Inf	-3.781	0.0115
									(LDPE-200) - (LDPE-50)	-1.02892	0.573	Inf	-1.794	0.8793
									(LDPE-200) - (Nylon-100)	-1.73956	0.584	Inf	-2.98	0.1452
									(LDPE-200) - (Nylon-200)	-1.73938	0.526	Inf	-3.306	0.058
									(LDPE-200) - (Nylon-50)	-2.05308	0.511	Inf	-4.016	0.0046
									(LDPE-200) - (PP-100)	-2.01521	0.548	Inf	-3.676	0.0169
									(LDPE-200) - (PP-200)	-2.57468	0.625	Inf	-4.117	0.0031
									(LDPE-200) - (PP-50)	-2.7578	0.53	Inf	-5.199	<.0001
									(LDPE-50) - (Nylon-100)	-0.710635	0.577	Inf	-1.232	0.9945
									(LDPE-50) - (Nylon-200)	-0.710461	0.517	Inf	-1.373	0.985
									(LDPE-50) - (Nylon-50)	-1.02416	0.502	Inf	-2.04	0.7425
									(LDPE-50) - (PP-100)	-0.986289	0.542	Inf	-1.819	0.8681
									(LDPE-50) - (PP-200)	-1.54576	0.613	Inf	-2.521	0.3928
									(LDPE-50) - (PP-50)	-1.72887	0.521	Inf	-3.321	0.0553
									(Nylon-100) - (Nylon-200)	0.000173	0.523	Inf	0	1
									(Nylon-100) - (Nylon-50)	-0.313524	0.506	Inf	-0.62	1
									(Nylon-100) - (PP-100)	-0.275655	0.547	Inf	-0.504	1
									(Nylon-100) - (PP-200)	-0.835128	0.616	Inf	-1.355	0.9867
									(Nylon-100) - (PP-50)	-1.01824	0.524	Inf	-1.942	0.8032
									(Nylon-200) - (Nylon-50)	-0.313697	0.438	Inf	-0.716	1
									(Nylon-200) - (PP-100)	-0.275828	0.485	Inf	-0.569	1
									(Nylon-200) - (PP-200)	-0.835301	0.556	Inf	-1.501	0.9677
									(Nylon-200) - (PP-50)	-1.01841	0.458	Inf	-2.225	0.6113
									(Nylon-50) - (PP-100)	0.037869	0.467	Inf	0.081	1
									(Nylon-50) - (PP-200)	-0.521604	0.543	Inf	-0.96	0.9996
									(Nylon-50) - (PP-50)	-0.704715	0.44	Inf	-1.601	0.9462
									(PP-100) - (PP-200)	-0.559473	0.583	Inf	-0.96	0.9996
									(PP-100) - (PP-50)	-0.742584	0.486	Inf	-1.529	0.9625
									(PP-200) - (PP-50)	-0.183111	0.559	Inf	-0.328	1
									Day.of.experiment = 7:
									contrast	estimate	SE	df	z.ratio	p.value
									(Control-Fresh) - (Control-Leachate)	-1.18737	0.842	Inf	-1.41	0.981
									(Control-Fresh) - (HDPE-100)	3.10316	0.948	Inf	3.275	0.0637
									(Control-Fresh) - (HDPE-200)	1.08953	0.839	Inf	1.298	0.991
									(Control-Fresh) - (HDPE-50)	0.10814	0.981	Inf	0.11	1
									(Control-Fresh) - (LDPE-100)	1.72758	0.883	Inf	1.956	0.7949
									(Control-Fresh) - (LDPE-200)	3.12277	0.9	Inf	3.47	0.0343
									(Control-Fresh) - (LDPE-50)	1.35615	0.886	Inf	1.53	0.9624
									(Control-Fresh) - (Nylon-100)	0.34031	0.889	Inf	0.383	1
									(Control-Fresh) - (Nylon-200)	0.384725	0.782	Inf	0.492	1
									(Control-Fresh) - (Nylon-50)	-0.071667	0.752	Inf	-0.095	1
									(Control-Fresh) - (PP-100)	-0.052758	0.829	Inf	-0.064	1
									(Control-Fresh) - (PP-200)	-0.958474	0.932	Inf	-1.028	0.9991
									(Control-Fresh) - (PP-50)	-1.21851	0.788	Inf	-1.547	0.959
									(Control-Leachate) - (HDPE-100)	4.29053	1	Inf	4.275	0.0016
									(Control-Leachate) - (HDPE-200)	2.2769	0.898	Inf	2.535	0.3836
									(Control-Leachate) - (HDPE-50)	1.29551	1.03	Inf	1.258	0.9932
									(Control-Leachate) - (LDPE-100)	2.91495	0.941	Inf	3.098	0.1062
									(Control-Leachate) - (LDPE-200)	4.31014	0.955	Inf	4.512	0.0005
									(Control-Leachate) - (LDPE-50)	2.54352	0.942	Inf	2.7	0.2786
									(Control-Leachate) - (Nylon-100)	1.52768	0.944	Inf	1.619	0.9416
									(Control-Leachate) - (Nylon-200)	1.57209	0.845	Inf	1.86	0.8482
									(Control-Leachate) - (Nylon-50)	1.1157	0.816	Inf	1.367	0.9855
									(Control-Leachate) - (PP-100)	1.13461	0.885	Inf	1.281	0.992
									(Control-Leachate) - (PP-200)	0.228893	0.987	Inf	0.232	1
									(Control-Leachate) - (PP-50)	-0.031145	0.847	Inf	-0.037	1
									(HDPE-100) - (HDPE-200)	-2.01363	0.99	Inf	-2.034	0.7464
									(HDPE-100) - (HDPE-50)	-2.99502	1.12	Inf	-2.681	0.2895
									(HDPE-100) - (LDPE-100)	-1.37558	1.03	Inf	-1.34	0.9879
									(HDPE-100) - (LDPE-200)	0.019608	1.03	Inf	0.019	1
									(HDPE-100) - (LDPE-50)	-1.74702	1.03	Inf	-1.697	0.9176
									(HDPE-100) - (Nylon-100)	-2.76285	1.04	Inf	-2.657	0.3041
									(HDPE-100) - (Nylon-200)	-2.71844	0.946	Inf	-2.873	0.1891
									(HDPE-100) - (Nylon-50)	-3.17483	0.924	Inf	-3.435	0.0386
									(HDPE-100) - (PP-100)	-3.15592	0.988	Inf	-3.194	0.0809
									(HDPE-100) - (PP-200)	-4.06164	1.08	Inf	-3.77	0.012
									(HDPE-100) - (PP-50)	-4.32168	0.957	Inf	-4.517	0.0005
									(HDPE-200) - (HDPE-50)	-0.981392	1.02	Inf	-0.961	0.9996
									(HDPE-200) - (LDPE-100)	0.638053	0.93	Inf	0.686	1
									(HDPE-200) - (LDPE-200)	2.03324	0.94	Inf	2.163	0.6569
									(HDPE-200) - (LDPE-50)	0.266616	0.931	Inf	0.286	1
									(HDPE-200) - (Nylon-100)	-0.749222	0.936	Inf	-0.8	0.9999
									(HDPE-200) - (Nylon-200)	-0.704807	0.836	Inf	-0.843	0.9999
									(HDPE-200) - (Nylon-50)	-1.1612	0.809	Inf	-1.435	0.978
									(HDPE-200) - (PP-100)	-1.14229	0.881	Inf	-1.296	0.9911
									(HDPE-200) - (PP-200)	-2.04801	0.986	Inf	-2.077	0.7176
									(HDPE-200) - (PP-50)	-2.30804	0.843	Inf	-2.738	0.2572
									(HDPE-50) - (LDPE-100)	1.61945	1.06	Inf	1.528	0.9627
									(HDPE-50) - (LDPE-200)	3.01463	1.07	Inf	2.827	0.211
									(HDPE-50) - (LDPE-50)	1.24801	1.06	Inf	1.179	0.9964
									(HDPE-50) - (Nylon-100)	0.23217	1.06	Inf	0.219	1
									(HDPE-50) - (Nylon-200)	0.276585	0.976	Inf	0.283	1
									(HDPE-50) - (Nylon-50)	-0.179806	0.953	Inf	-0.189	1
									(HDPE-50) - (PP-100)	-0.160898	1.02	Inf	-0.158	1
									(HDPE-50) - (PP-200)	-1.06661	1.11	Inf	-0.959	0.9996
									(HDPE-50) - (PP-50)	-1.32665	0.981	Inf	-1.352	0.9869
									(LDPE-100) - (LDPE-200)	1.39519	0.977	Inf	1.428	0.9789
									(LDPE-100) - (LDPE-50)	-0.371437	0.972	Inf	-0.382	1
									(LDPE-100) - (Nylon-100)	-1.38728	0.979	Inf	-1.417	0.9801
									(LDPE-100) - (Nylon-200)	-1.34286	0.882	Inf	-1.523	0.9638
									(LDPE-100) - (Nylon-50)	-1.79925	0.857	Inf	-2.098	0.7028
									(LDPE-100) - (PP-100)	-1.78034	0.924	Inf	-1.927	0.8118
									(LDPE-100) - (PP-200)	-2.68606	1.03	Inf	-2.618	0.3286
									(LDPE-100) - (PP-50)	-2.9461	0.889	Inf	-3.314	0.0565
									(LDPE-200) - (LDPE-50)	-1.76662	0.98	Inf	-1.803	0.8753
									(LDPE-200) - (Nylon-100)	-2.78246	0.989	Inf	-2.815	0.2168
									(LDPE-200) - (Nylon-200)	-2.73805	0.895	Inf	-3.058	0.1183
									(LDPE-200) - (Nylon-50)	-3.19444	0.871	Inf	-3.666	0.0175
									(LDPE-200) - (PP-100)	-3.17553	0.935	Inf	-3.395	0.0439
									(LDPE-200) - (PP-200)	-4.08125	1.05	Inf	-3.9	0.0073
									(LDPE-200) - (PP-50)	-4.34128	0.904	Inf	-4.801	0.0001
									(LDPE-50) - (Nylon-100)	-1.01584	0.978	Inf	-1.039	0.999
									(LDPE-50) - (Nylon-200)	-0.971423	0.883	Inf	-1.101	0.9982
									(LDPE-50) - (Nylon-50)	-1.42782	0.858	Inf	-1.664	0.9284
									(LDPE-50) - (PP-100)	-1.40891	0.926	Inf	-1.522	0.9639
									(LDPE-50) - (PP-200)	-2.31462	1.03	Inf	-2.252	0.5907
									(LDPE-50) - (PP-50)	-2.57466	0.89	Inf	-2.893	0.1803
									(Nylon-100) - (Nylon-200)	0.044415	0.886	Inf	0.05	1
									(Nylon-100) - (Nylon-50)	-0.411977	0.86	Inf	-0.479	1
									(Nylon-100) - (PP-100)	-0.393068	0.929	Inf	-0.423	1
									(Nylon-100) - (PP-200)	-1.29878	1.03	Inf	-1.261	0.9931
									(Nylon-100) - (PP-50)	-1.55882	0.892	Inf	-1.748	0.8987
									(Nylon-200) - (Nylon-50)	-0.456392	0.753	Inf	-0.606	1
									(Nylon-200) - (PP-100)	-0.437483	0.829	Inf	-0.528	1
									(Nylon-200) - (PP-200)	-1.3432	0.935	Inf	-1.436	0.9777
									(Nylon-200) - (PP-50)	-1.60324	0.786	Inf	-2.04	0.7422
									(Nylon-50) - (PP-100)	0.018909	0.801	Inf	0.024	1
									(Nylon-50) - (PP-200)	-0.886807	0.913	Inf	-0.971	0.9995
									(Nylon-50) - (PP-50)	-1.14684	0.758	Inf	-1.514	0.9655
									(PP-100) - (PP-200)	-0.905716	0.978	Inf	-0.926	0.9997
									(PP-100) - (PP-50)	-1.16575	0.832	Inf	-1.401	0.9821
									(PP-200) - (PP-50)	-0.260038	0.94	Inf	-0.277	1

## Sheet: Table S4a
Comparisons	Estimate	Std. Error	z value	p-value
(Intercept)	2.8176	0.454824	6.195	5.83e-10
Control-Leachate	-0.028871	0.66685	-0.043	0.96547
HDPE-100	0.790898	0.61882	1.278	0.20122
HDPE-200	-0.044699	0.634559	-0.07	0.94384
HDPE-50	0.108085	0.612515	0.176	0.85993
LDPE-100	0.097396	0.643139	0.151	0.87963
LDPE-200	0.568509	0.65673	0.866	0.38667
LDPE-50	-0.023137	0.633318	-0.037	0.97086
Nylon-100	0.410069	0.617313	0.664	0.50651
Nylon-200	0.329031	0.78932	0.417	0.67679
Nylon-50	0.86034	0.82651	1.041	0.29791
PP-100	0.446979	0.684758	0.653	0.51391
PP-200	0.003929	0.607957	0.006	0.99484
PP-50	0.009894	0.694817	0.014	0.98864
Day	-0.084049	0.140032	-0.6	0.54836
Control-Leachate : Day	0.02851	0.20316	0.14	0.8884
HDPE-100 : Day	-0.519334	0.186409	-2.786	0.00534
HDPE-200 : Day	0.040362	0.192747	0.209	0.83413
HDPE-50 : Day	-0.052007	0.187758	-0.277	0.78179
LDPE-100 : Day	-0.028734	0.195891	-0.147	0.88338
LDPE-200 : Day	-0.309173	0.200661	-1.541	0.12337
LDPE-50 : Day	-0.029577	0.192198	-0.154	0.8777
Nylon-100 : Day	-0.340294	0.187492	-1.815	0.06953
Nylon-200 : Day	-0.232407	0.240791	-0.965	0.33445
Nylon-50 : Day	-0.555761	0.246715	-2.253	0.02428
PP-100 : Day	-0.232951	0.208532	-1.117	0.26395
PP-200 : Day	-0.032068	0.184741	-0.174	0.86219
PP-50 : Day	-0.123452	0.209972	-0.588	0.55657

## Sheet: Table S4b
Day	Contrasts	Estimate	SE	z ratio	p-value
0	(Control-Fresh) - (Control-Leachate)	0.028871	0.667	0.043	1
	(Control-Fresh) - (HDPE-100)	-0.790898	0.619	-1.278	0.9922
	(Control-Fresh) - (HDPE-200)	0.044699	0.635	0.07	1
	(Control-Fresh) - (HDPE-50)	-0.108085	0.613	-0.176	1
	(Control-Fresh) - (LDPE-100)	-0.097396	0.643	-0.151	1
	(Control-Fresh) - (LDPE-200)	-0.568509	0.657	-0.866	0.9999
	(Control-Fresh) - (LDPE-50)	0.023137	0.633	0.037	1
	(Control-Fresh) - (Nylon-100)	-0.410069	0.617	-0.664	1
	(Control-Fresh) - (Nylon-200)	-0.329031	0.789	-0.417	1
	(Control-Fresh) - (Nylon-50)	-0.86034	0.827	-1.041	0.999
	(Control-Fresh) - (PP-100)	-0.446979	0.685	-0.653	1
	(Control-Fresh) - (PP-200)	-0.003929	0.608	-0.006	1
	(Control-Fresh) - (PP-50)	-0.009894	0.695	-0.014	1
	(Control-Leachate) - (HDPE-100)	-0.81977	0.653	-1.256	0.9934
	(Control-Leachate) - (HDPE-200)	0.015827	0.667	0.024	1
	(Control-Leachate) - (HDPE-50)	-0.136956	0.647	-0.212	1
	(Control-Leachate) - (LDPE-100)	-0.126267	0.675	-0.187	1
	(Control-Leachate) - (LDPE-200)	-0.597381	0.688	-0.868	0.9999
	(Control-Leachate) - (LDPE-50)	-0.005734	0.666	-0.009	1
	(Control-Leachate) - (Nylon-100)	-0.43894	0.651	-0.675	1
	(Control-Leachate) - (Nylon-200)	-0.357902	0.816	-0.439	1
	(Control-Leachate) - (Nylon-50)	-0.889211	0.852	-1.044	0.999
	(Control-Leachate) - (PP-100)	-0.47585	0.716	-0.665	1
	(Control-Leachate) - (PP-200)	-0.0328	0.642	-0.051	1
	(Control-Leachate) - (PP-50)	-0.038765	0.725	-0.053	1
	(HDPE-100) - (HDPE-200)	0.835597	0.62	1.348	0.9872
	(HDPE-100) - (HDPE-50)	0.682813	0.597	1.144	0.9973
	(HDPE-100) - (LDPE-100)	0.693502	0.628	1.105	0.9981
	(HDPE-100) - (Nylon-100)	0.380829	0.599	0.635	1
	(HDPE-100) - (PP-100)	0.343919	0.67	0.513	1
	(HDPE-200) - (HDPE-50)	-0.152784	0.613	-0.249	1
	(HDPE-200) - (LDPE-200)	-0.613208	0.657	-0.934	0.9997
	(HDPE-200) - (Nylon-200)	-0.37373	0.79	-0.473	1
	(HDPE-200) - (PP-200)	-0.048628	0.609	-0.08	1
	(HDPE-50) - (LDPE-50)	0.131222	0.612	0.214	1
	(HDPE-50) - (Nylon-50)	-0.752255	0.81	-0.928	0.9997
	(HDPE-50) - (PP-50)	0.098191	0.675	0.145	1
	(LDPE-100) - (LDPE-200)	-0.471113	0.663	-0.71	1
	(LDPE-100) - (LDPE-50)	0.120533	0.643	0.188	1
	(LDPE-100) - (Nylon-100)	-0.312673	0.625	-0.5	1
	(LDPE-100) - (PP-100)	-0.349583	0.692	-0.505	1
	(LDPE-200) - (LDPE-50)	0.591646	0.656	0.901	0.9998
	(LDPE-200) - (Nylon-200)	0.239478	0.805	0.297	1
	(LDPE-200) - (PP-200)	0.56458	0.63	0.896	0.9998
	(LDPE-50) - (Nylon-50)	-0.883477	0.826	-1.07	0.9987
	(LDPE-50) - (PP-50)	-0.033031	0.695	-0.048	1
	(Nylon-100) - (Nylon-200)	0.081038	0.774	0.105	1
	(Nylon-100) - (Nylon-50)	-0.450271	0.81	-0.556	1
	(Nylon-100) - (PP-100)	-0.03691	0.669	-0.055	1
	(Nylon-200) - (Nylon-50)	-0.531309	0.949	-0.56	1
	(Nylon-200) - (PP-200)	0.325102	0.768	0.423	1
	(Nylon-50) - (PP-50)	0.850446	0.874	0.973	0.9995
	(PP-100) - (PP-200)	0.44305	0.66	0.671	1
	(PP-100) - (PP-50)	0.437086	0.74	0.59	1
	(PP-200) - (PP-50)	-0.005965	0.671	-0.009	1
1	(Control-Fresh) - (Control-Leachate)	0.000362	0.491	0.001	1
	(Control-Fresh) - (HDPE-100)	-0.271564	0.457	-0.595	1
	(Control-Fresh) - (HDPE-200)	0.004337	0.468	0.009	1
	(Control-Fresh) - (HDPE-50)	-0.056078	0.451	-0.124	1
	(Control-Fresh) - (LDPE-100)	-0.068662	0.473	-0.145	1
	(Control-Fresh) - (LDPE-200)	-0.259336	0.482	-0.538	1
	(Control-Fresh) - (LDPE-50)	0.052714	0.467	0.113	1
	(Control-Fresh) - (Nylon-100)	-0.069775	0.455	-0.153	1
	(Control-Fresh) - (Nylon-200)	-0.096624	0.58	-0.167	1
	(Control-Fresh) - (Nylon-50)	-0.304579	0.608	-0.501	1
	(Control-Fresh) - (PP-100)	-0.214028	0.502	-0.426	1
	(Control-Fresh) - (PP-200)	0.02814	0.448	0.063	1
	(Control-Fresh) - (PP-50)	0.113559	0.514	0.221	1
	(Control-Leachate) - (HDPE-100)	-0.271926	0.482	-0.565	1
	(Control-Leachate) - (HDPE-200)	0.003975	0.491	0.008	1
	(Control-Leachate) - (HDPE-50)	-0.05644	0.476	-0.119	1
	(Control-Leachate) - (LDPE-100)	-0.069024	0.496	-0.139	1
	(Control-Leachate) - (LDPE-200)	-0.259698	0.505	-0.514	1
	(Control-Leachate) - (LDPE-50)	0.052352	0.491	0.107	1
	(Control-Leachate) - (Nylon-100)	-0.070136	0.48	-0.146	1
	(Control-Leachate) - (Nylon-200)	-0.096986	0.6	-0.162	1
	(Control-Leachate) - (Nylon-50)	-0.304941	0.627	-0.486	1
	(Control-Leachate) - (PP-100)	-0.214389	0.525	-0.409	1
	(Control-Leachate) - (PP-200)	0.027778	0.473	0.059	1
	(Control-Leachate) - (PP-50)	0.113197	0.536	0.211	1
	(HDPE-100) - (HDPE-200)	0.275901	0.457	0.603	1
	(HDPE-100) - (HDPE-50)	0.215486	0.44	0.489	1
	(HDPE-100) - (LDPE-100)	0.202902	0.462	0.439	1
	(HDPE-100) - (Nylon-100)	0.20179	0.444	0.454	1
	(HDPE-100) - (PP-100)	0.057537	0.492	0.117	1
	(HDPE-200) - (HDPE-50)	-0.060415	0.451	-0.134	1
	(HDPE-200) - (LDPE-200)	-0.263673	0.483	-0.546	1
	(HDPE-200) - (Nylon-200)	-0.10096	0.581	-0.174	1
	(HDPE-200) - (PP-200)	0.023803	0.449	0.053	1
	(HDPE-50) - (LDPE-50)	0.108792	0.451	0.241	1
	(HDPE-50) - (Nylon-50)	-0.248501	0.596	-0.417	1
	(HDPE-50) - (PP-50)	0.169637	0.499	0.34	1
	(LDPE-100) - (LDPE-200)	-0.190674	0.487	-0.392	1
	(LDPE-100) - (LDPE-50)	0.121376	0.472	0.257	1
	(LDPE-100) - (Nylon-100)	-0.001113	0.461	-0.002	1
	(LDPE-100) - (PP-100)	-0.145366	0.507	-0.287	1
	(LDPE-200) - (LDPE-50)	0.31205	0.482	0.647	1
	(LDPE-200) - (Nylon-200)	0.162712	0.593	0.275	1
	(LDPE-200) - (PP-200)	0.287476	0.463	0.62	1
	(LDPE-50) - (Nylon-50)	-0.357293	0.608	-0.587	1
	(LDPE-50) - (PP-50)	0.060845	0.514	0.118	1
	(Nylon-100) - (Nylon-200)	-0.026849	0.571	-0.047	1
	(Nylon-100) - (Nylon-50)	-0.234804	0.598	-0.392	1
	(Nylon-100) - (PP-100)	-0.144253	0.491	-0.294	1
	(Nylon-200) - (Nylon-50)	-0.207955	0.699	-0.298	1
	(Nylon-200) - (PP-200)	0.124763	0.566	0.221	1
	(Nylon-50) - (PP-50)	0.418138	0.645	0.648	1
	(PP-100) - (PP-200)	0.242167	0.485	0.5	1
	(PP-100) - (PP-50)	0.327587	0.546	0.6	1
	(PP-200) - (PP-50)	0.085419	0.497	0.172	1
3	(Control-Fresh) - (Control-Leachate)	-0.056657	0.287	-0.197	1
	(Control-Fresh) - (HDPE-100)	0.767104	0.261	2.942	0.16
	(Control-Fresh) - (HDPE-200)	-0.076388	0.271	-0.282	1
	(Control-Fresh) - (HDPE-50)	0.047935	0.267	0.18	1
	(Control-Fresh) - (LDPE-100)	-0.011194	0.271	-0.041	1
	(Control-Fresh) - (LDPE-200)	0.35901	0.278	1.291	0.9914
	(Control-Fresh) - (LDPE-50)	0.111868	0.27	0.414	1
	(Control-Fresh) - (Nylon-100)	0.610814	0.265	2.306	0.5507
	(Control-Fresh) - (Nylon-200)	0.36819	0.333	1.104	0.9981
	(Control-Fresh) - (Nylon-50)	0.806942	0.33	2.449	0.4445
	(Control-Fresh) - (PP-100)	0.251875	0.283	0.891	0.9998
	(Control-Fresh) - (PP-200)	0.092276	0.262	0.352	1
	(Control-Fresh) - (PP-50)	0.360464	0.302	1.195	0.9959
	(Control-Leachate) - (HDPE-100)	0.823761	0.27	3.052	0.1202
	(Control-Leachate) - (HDPE-200)	-0.01973	0.282	-0.07	1
	(Control-Leachate) - (HDPE-50)	0.104593	0.277	0.377	1
	(Control-Leachate) - (LDPE-100)	0.045463	0.282	0.161	1
	(Control-Leachate) - (LDPE-200)	0.415667	0.285	1.461	0.9743
	(Control-Leachate) - (LDPE-50)	0.168526	0.283	0.595	1
	(Control-Leachate) - (Nylon-100)	0.667471	0.273	2.446	0.4466
	(Control-Leachate) - (Nylon-200)	0.424847	0.343	1.237	0.9943
	(Control-Leachate) - (Nylon-50)	0.8636	0.341	2.53	0.3872
	(Control-Leachate) - (PP-100)	0.308533	0.297	1.04	0.999
	(Control-Leachate) - (PP-200)	0.148934	0.273	0.546	1
	(Control-Leachate) - (PP-50)	0.417121	0.316	1.322	0.9893
	(HDPE-100) - (HDPE-200)	-0.843492	0.256	-3.296	0.0597
	(HDPE-100) - (HDPE-50)	-0.719169	0.249	-2.89	0.1815
	(HDPE-100) - (LDPE-100)	-0.778298	0.255	-3.05	0.1209
	(HDPE-100) - (Nylon-100)	-0.15629	0.243	-0.642	1
	(HDPE-100) - (PP-100)	-0.515229	0.271	-1.904	0.8251
	(HDPE-200) - (HDPE-50)	0.124323	0.263	0.473	1
	(HDPE-200) - (LDPE-200)	0.435398	0.272	1.603	0.9459
	(HDPE-200) - (Nylon-200)	0.444578	0.332	1.339	0.988
	(HDPE-200) - (PP-200)	0.168664	0.258	0.653	1
	(HDPE-50) - (LDPE-50)	0.063933	0.264	0.242	1
	(HDPE-50) - (Nylon-50)	0.759007	0.325	2.334	0.5295
	(HDPE-50) - (PP-50)	0.312529	0.297	1.051	0.9989
	(LDPE-100) - (LDPE-200)	0.370204	0.271	1.364	0.9858
	(LDPE-100) - (LDPE-50)	0.123062	0.269	0.457	1
	(LDPE-100) - (Nylon-100)	0.622008	0.259	2.4	0.4797
	(LDPE-100) - (PP-100)	0.26307	0.282	0.934	0.9997
	(LDPE-200) - (LDPE-50)	-0.247142	0.273	-0.904	0.9998
	(LDPE-200) - (Nylon-200)	0.00918	0.336	0.027	1
	(LDPE-200) - (PP-200)	-0.266733	0.26	-1.027	0.9991
	(LDPE-50) - (Nylon-50)	0.695074	0.328	2.119	0.688
	(LDPE-50) - (PP-50)	0.248596	0.301	0.827	0.9999
	(Nylon-100) - (Nylon-200)	-0.242624	0.325	-0.747	1
	(Nylon-100) - (Nylon-50)	0.196129	0.322	0.609	1
	(Nylon-100) - (PP-100)	-0.358938	0.275	-1.305	0.9905
	(Nylon-200) - (Nylon-50)	0.438752	0.374	1.174	0.9965
	(Nylon-200) - (PP-200)	-0.275913	0.323	-0.854	0.9999
	(Nylon-50) - (PP-50)	-0.446478	0.35	-1.275	0.9924
	(PP-100) - (PP-200)	-0.159599	0.273	-0.585	1
	(PP-100) - (PP-50)	0.108589	0.31	0.35	1
	(PP-200) - (PP-50)	0.268188	0.293	0.916	0.9997
5	(Control-Fresh) - (Control-Leachate)	-0.113677	0.504	-0.226	1
	(Control-Fresh) - (HDPE-100)	1.80577	0.453	3.983	0.0053
	(Control-Fresh) - (HDPE-200)	-0.157112	0.475	-0.331	1
	(Control-Fresh) - (HDPE-50)	0.151949	0.47	0.323	1
	(Control-Fresh) - (LDPE-100)	0.046274	0.48	0.096	1
	(Control-Fresh) - (LDPE-200)	0.977356	0.494	1.978	0.7816
	(Control-Fresh) - (LDPE-50)	0.171022	0.473	0.361	1
	(Control-Fresh) - (Nylon-100)	1.2914	0.463	2.789	0.23
	(Control-Fresh) - (Nylon-200)	0.833004	0.591	1.409	0.9812
	(Control-Fresh) - (Nylon-50)	1.91846	0.578	3.318	0.0558
	(Control-Fresh) - (PP-100)	0.717778	0.505	1.42	0.9798
	(Control-Fresh) - (PP-200)	0.156413	0.458	0.342	1
	(Control-Fresh) - (PP-50)	0.607369	0.52	1.167	0.9967
	(Control-Leachate) - (HDPE-100)	1.91945	0.469	4.094	0.0034
	(Control-Leachate) - (HDPE-200)	-0.043436	0.495	-0.088	1
	(Control-Leachate) - (HDPE-50)	0.265626	0.491	0.542	1
	(Control-Leachate) - (LDPE-100)	0.15995	0.5	0.32	1
	(Control-Leachate) - (LDPE-200)	1.09103	0.504	2.165	0.6556
	(Control-Leachate) - (LDPE-50)	0.284699	0.497	0.572	1
	(Control-Leachate) - (Nylon-100)	1.40508	0.475	2.957	0.1541
	(Control-Leachate) - (Nylon-200)	0.94668	0.605	1.564	0.9553
	(Control-Leachate) - (Nylon-50)	2.03214	0.596	3.411	0.0417
	(Control-Leachate) - (PP-100)	0.831455	0.532	1.564	0.9552
	(Control-Leachate) - (PP-200)	0.27009	0.477	0.566	1
	(Control-Leachate) - (PP-50)	0.721046	0.546	1.321	0.9894
	(HDPE-100) - (HDPE-200)	-1.96288	0.444	-4.423	0.0008
	(HDPE-100) - (HDPE-50)	-1.65382	0.433	-3.822	0.0099
	(HDPE-100) - (LDPE-100)	-1.7595	0.446	-3.947	0.0061
	(HDPE-100) - (Nylon-100)	-0.51437	0.412	-1.248	0.9937
	(HDPE-100) - (PP-100)	-1.08799	0.479	-2.272	0.5763
	(HDPE-200) - (HDPE-50)	0.309061	0.464	0.666	1
	(HDPE-200) - (LDPE-200)	1.13447	0.481	2.357	0.5121
	(HDPE-200) - (Nylon-200)	0.990116	0.585	1.692	0.9194
	(HDPE-200) - (PP-200)	0.313526	0.45	0.696	1
	(HDPE-50) - (LDPE-50)	0.019073	0.467	0.041	1
	(HDPE-50) - (Nylon-50)	1.76652	0.571	3.095	0.1072
	(HDPE-50) - (PP-50)	0.45542	0.513	0.887	0.9998
	(LDPE-100) - (LDPE-200)	0.931082	0.484	1.926	0.8128
	(LDPE-100) - (LDPE-50)	0.124748	0.477	0.262	1
	(LDPE-100) - (Nylon-100)	1.24513	0.454	2.741	0.2554
	(LDPE-100) - (PP-100)	0.671505	0.507	1.325	0.9891
	(LDPE-200) - (LDPE-50)	-0.806334	0.486	-1.66	0.9297
	(LDPE-200) - (Nylon-200)	-0.144352	0.59	-0.245	1
	(LDPE-200) - (PP-200)	-0.820943	0.457	-1.796	0.8784
	(LDPE-50) - (Nylon-50)	1.74744	0.573	3.051	0.1206
	(LDPE-50) - (PP-50)	0.436347	0.518	0.842	0.9999
	(Nylon-100) - (Nylon-200)	-0.458398	0.567	-0.808	0.9999
	(Nylon-100) - (Nylon-50)	0.627062	0.554	1.132	0.9976
	(Nylon-100) - (PP-100)	-0.573624	0.491	-1.169	0.9967
	(Nylon-200) - (Nylon-50)	1.08546	0.652	1.664	0.9283
	(Nylon-200) - (PP-200)	-0.67659	0.566	-1.195	0.9959
	(Nylon-50) - (PP-50)	-1.31109	0.603	-2.174	0.6485
	(PP-100) - (PP-200)	-0.561365	0.485	-1.157	0.997
	(PP-100) - (PP-50)	-0.110409	0.541	-0.204	1
	(PP-200) - (PP-50)	0.450956	0.5	0.901	0.9998
7	(Control-Fresh) - (Control-Leachate)	-0.170696	0.869	-0.196	1
	(Control-Fresh) - (HDPE-100)	2.84444	0.788	3.609	0.0214
	(Control-Fresh) - (HDPE-200)	-0.237837	0.822	-0.289	1
	(Control-Fresh) - (HDPE-50)	0.255962	0.808	0.317	1
	(Control-Fresh) - (LDPE-100)	0.103741	0.834	0.124	1
	(Control-Fresh) - (LDPE-200)	1.5957	0.856	1.864	0.846
	(Control-Fresh) - (LDPE-50)	0.230176	0.819	0.281	1
	(Control-Fresh) - (Nylon-100)	1.97199	0.8	2.465	0.4326
	(Control-Fresh) - (Nylon-200)	1.29782	1.03	1.265	0.9929
	(Control-Fresh) - (Nylon-50)	3.02998	1.02	2.961	0.1523
	(Control-Fresh) - (PP-100)	1.18368	0.882	1.341	0.9878
	(Control-Fresh) - (PP-200)	0.22055	0.79	0.279	1
	(Control-Fresh) - (PP-50)	0.854274	0.896	0.953	0.9996
	(Control-Leachate) - (HDPE-100)	3.01514	0.82	3.676	0.0169
	(Control-Leachate) - (HDPE-200)	-0.067141	0.859	-0.078	1
	(Control-Leachate) - (HDPE-50)	0.426658	0.847	0.504	1
	(Control-Leachate) - (LDPE-100)	0.274437	0.87	0.315	1
	(Control-Leachate) - (LDPE-200)	1.7664	0.88	2.007	0.7639
	(Control-Leachate) - (LDPE-50)	0.400872	0.862	0.465	1
	(Control-Leachate) - (Nylon-100)	2.14269	0.827	2.59	0.3465
	(Control-Leachate) - (Nylon-200)	1.46851	1.05	1.396	0.9825
	(Control-Leachate) - (Nylon-50)	3.20068	1.05	3.04	0.1243
	(Control-Leachate) - (PP-100)	1.35438	0.927	1.461	0.9742
	(Control-Leachate) - (PP-200)	0.391246	0.827	0.473	1
	(Control-Leachate) - (PP-50)	1.02497	0.939	1.091	0.9984
	(HDPE-100) - (HDPE-200)	-3.08228	0.777	-3.968	0.0056
	(HDPE-100) - (HDPE-50)	-2.58848	0.755	-3.429	0.0393
	(HDPE-100) - (LDPE-100)	-2.7407	0.784	-3.496	0.0316
	(HDPE-100) - (Nylon-100)	-0.87245	0.727	-1.2	0.9957
	(HDPE-100) - (PP-100)	-1.66076	0.843	-1.97	0.7869
	(HDPE-200) - (HDPE-50)	0.493799	0.801	0.616	1
	(HDPE-200) - (LDPE-200)	1.83354	0.841	2.181	0.6433
	(HDPE-200) - (LDPE-50)	0.468013	0.817	0.573	1
	(HDPE-200) - (Nylon-200)	1.53565	1.02	1.51	0.9663
	(HDPE-200) - (PP-200)	0.458387	0.781	0.587	1
	(HDPE-50) - (LDPE-50)	-0.025786	0.805	-0.032	1
	(HDPE-50) - (Nylon-100)	1.71603	0.764	2.247	0.5948
	(HDPE-50) - (Nylon-200)	1.04185	1.01	1.033	0.9991
	(HDPE-50) - (Nylon-50)	2.77402	1.01	2.753	0.2491
	(HDPE-50) - (PP-50)	0.598312	0.88	0.68	1
	(LDPE-100) - (LDPE-200)	1.49196	0.847	1.761	0.8932
	(LDPE-100) - (LDPE-50)	0.126435	0.829	0.153	1
	(LDPE-100) - (Nylon-100)	1.86825	0.794	2.354	0.5142
	(LDPE-100) - (PP-100)	1.07994	0.889	1.215	0.9952
	(LDPE-100) - (PP-200)	0.116809	0.788	0.148	1
	(LDPE-200) - (LDPE-50)	-1.36553	0.846	-1.614	0.943
	(LDPE-200) - (Nylon-200)	-0.297884	1.03	-0.29	1
	(LDPE-200) - (PP-200)	-1.37515	0.799	-1.72	0.9092
	(LDPE-50) - (Nylon-50)	2.79981	1.02	2.757	0.2466
	(LDPE-50) - (PP-50)	0.624098	0.893	0.699	1
	(Nylon-100) - (Nylon-200)	-0.674173	0.988	-0.683	1
	(Nylon-100) - (Nylon-50)	1.058	0.984	1.075	0.9986
	(Nylon-100) - (PP-100)	-0.788309	0.858	-0.919	0.9997
	(Nylon-200) - (Nylon-50)	1.73217	1.16	1.493	0.9692
	(Nylon-200) - (PP-200)	-1.07727	0.984	-1.094	0.9983
	(Nylon-50) - (PP-50)	-2.17571	1.07	-2.039	0.7432
	(PP-100) - (PP-200)	-0.963131	0.847	-1.137	0.9975
	(PP-100) - (PP-50)	-0.329407	0.941	-0.35	1
	(PP-200) - (PP-50)	0.633724	0.861	0.736	1

## Sheet: Table S5a
Comparison	Estimate	Std. Error	z value	p-value
(Intercept)	-3.66369	0.43942	-8.338	< 2e-16
Control-Leachate	0.34938	0.57652	0.606	0.544504
HDPE-100	0.71849	0.54945	1.308	0.19099
HDPE-200	-0.07536	0.58309	-0.129	0.897171
HDPE-50	0.22722	0.5657	0.402	0.687927
LDPE-100	0.55477	0.55018	1.008	0.313291
LDPE-200	0.47753	0.55765	0.856	0.391818
LDPE-50	0.367	0.58078	0.632	0.527441
Nylon-100	0.16148	0.58029	0.278	0.780803
Nylon-200	0.45735	0.56166	0.814	0.415484
Nylon-50	0.6054	0.56227	1.077	0.281615
PP-100	0.14617	0.57981	0.252	0.800967
PP-200	0.19925	0.57924	0.344	0.730851
PP-50	0.44405	0.56708	0.783	0.433598
Day	0.3554	0.10794	3.292	0.000993
Control-Leachate : Day	-0.08918	0.15941	-0.559	0.575887
HDPE-100 : Day	-0.27903	0.13951	-2	0.045491
HDPE-200 : Day	0.07276	0.14306	0.509	0.611018
HDPE-50 : Day	0.02823	0.14766	0.191	0.848379
LDPE-100 : Day	-0.2274	0.13718	-1.658	0.097388
LDPE-200 : Day	-0.25907	0.14018	-1.848	0.064582
LDPE-50 : Day	-0.11325	0.15466	-0.732	0.464018
Nylon-100 : Day	-0.05575	0.15414	-0.362	0.71758
Nylon-200 : Day	-0.24007	0.15435	-1.555	0.119866
Nylon-50 : Day	-0.28947	0.14905	-1.942	0.052133
PP-100 : Day	-0.02661	0.14753	-0.18	0.856866
PP-200 : Day	-0.02713	0.14754	-0.184	0.854111
PP-50 : Day	-0.04529	0.14753	-0.307	0.758821

## Sheet: Table S5b
Day	Contrasts	Estimate	SE	z ratio	p-value
0	(Control-Fresh) - (Control-Leachate)	-0.349382	0.577	-0.606	1
	(Control-Fresh) - (HDPE-100)	-0.718488	0.549	-1.308	0.9903
	(Control-Fresh) - (HDPE-200)	0.075356	0.583	0.129	1
	(Control-Fresh) - (HDPE-50)	-0.227223	0.566	-0.402	1
	(Control-Fresh) - (LDPE-100)	-0.554767	0.55	-1.008	0.9993
	(Control-Fresh) - (LDPE-200)	-0.477529	0.558	-0.856	0.9999
	(Control-Fresh) - (LDPE-50)	-0.367004	0.581	-0.632	1
	(Control-Fresh) - (Nylon-100)	-0.161479	0.58	-0.278	1
	(Control-Fresh) - (Nylon-200)	-0.457353	0.562	-0.814	0.9999
	(Control-Fresh) - (Nylon-50)	-0.6054	0.562	-1.077	0.9986
	(Control-Fresh) - (PP-100)	-0.146167	0.58	-0.252	1
	(Control-Fresh) - (PP-200)	-0.199255	0.579	-0.344	1
	(Control-Fresh) - (PP-50)	-0.44405	0.567	-0.783	1
	(Control-Leachate) - (HDPE-100)	-0.369106	0.532	-0.694	1
	(Control-Leachate) - (HDPE-200)	0.424738	0.568	0.748	1
	(Control-Leachate) - (HDPE-50)	0.122159	0.549	0.222	1
	(Control-Leachate) - (LDPE-100)	-0.205385	0.533	-0.386	1
	(Control-Leachate) - (LDPE-200)	-0.128147	0.54	-0.237	1
	(Control-Leachate) - (LDPE-50)	-0.017621	0.565	-0.031	1
	(Control-Leachate) - (Nylon-100)	0.187904	0.564	0.333	1
	(Control-Leachate) - (Nylon-200)	-0.10797	0.544	-0.198	1
	(Control-Leachate) - (Nylon-50)	-0.256018	0.545	-0.47	1
	(Control-Leachate) - (PP-100)	0.203216	0.564	0.36	1
	(Control-Leachate) - (PP-200)	0.150128	0.563	0.266	1
	(Control-Leachate) - (PP-50)	-0.094668	0.55	-0.172	1
	(HDPE-100) - (HDPE-200)	0.793844	0.541	1.468	0.9732
	(HDPE-100) - (HDPE-50)	0.491265	0.52	0.945	0.9996
	(HDPE-100) - (LDPE-100)	0.163721	0.502	0.326	1
	(HDPE-100) - (Nylon-100)	0.557009	0.536	1.039	0.999
	(HDPE-100) - (PP-100)	0.572321	0.536	1.068	0.9987
	(HDPE-200) - (HDPE-50)	-0.302579	0.557	-0.543	1
	(HDPE-200) - (LDPE-200)	-0.552886	0.549	-1.007	0.9993
	(HDPE-200) - (Nylon-200)	-0.532709	0.553	-0.963	0.9996
	(HDPE-200) - (PP-200)	-0.274611	0.571	-0.481	1
	(HDPE-50) - (LDPE-50)	-0.139781	0.554	-0.252	1
	(HDPE-50) - (Nylon-50)	-0.378177	0.534	-0.709	1
	(HDPE-50) - (PP-50)	-0.216827	0.539	-0.402	1
	(LDPE-100) - (LDPE-200)	0.077238	0.511	0.151	1
	(LDPE-100) - (LDPE-50)	0.187763	0.537	0.349	1
	(LDPE-100) - (Nylon-100)	0.393288	0.537	0.732	1
	(LDPE-100) - (PP-100)	0.4086	0.537	0.761	1
	(LDPE-200) - (Nylon-200)	0.020177	0.524	0.039	1
	(LDPE-200) - (PP-200)	0.278275	0.544	0.512	1
	(LDPE-50) - (Nylon-50)	-0.238397	0.55	-0.434	1
	(LDPE-50) - (PP-50)	-0.077047	0.555	-0.139	1
	(Nylon-100) - (Nylon-200)	-0.295874	0.549	-0.539	1
	(Nylon-100) - (Nylon-50)	-0.443922	0.549	-0.808	0.9999
	(Nylon-100) - (PP-100)	0.015312	0.568	0.027	1
	(Nylon-200) - (Nylon-50)	-0.148048	0.529	-0.28	1
	(Nylon-200) - (PP-200)	0.258098	0.548	0.471	1
	(Nylon-50) - (PP-50)	0.16135	0.535	0.302	1
	(PP-100) - (PP-200)	-0.053088	0.567	-0.094	1
	(PP-100) - (PP-50)	-0.297884	0.554	-0.537	1
	(PP-200) - (PP-50)	-0.244796	0.554	-0.442	1
1	(Control-Fresh) - (Control-Leachate)	-0.260206	0.457	-0.569	1
	(Control-Fresh) - (HDPE-100)	-0.439455	0.445	-0.987	0.9994
	(Control-Fresh) - (HDPE-200)	0.002592	0.469	0.006	1
	(Control-Fresh) - (HDPE-50)	-0.255453	0.453	-0.564	1
	(Control-Fresh) - (LDPE-100)	-0.327366	0.446	-0.734	1
	(Control-Fresh) - (LDPE-200)	-0.218463	0.451	-0.485	1
	(Control-Fresh) - (LDPE-50)	-0.253755	0.462	-0.549	1
	(Control-Fresh) - (Nylon-100)	-0.105727	0.462	-0.229	1
	(Control-Fresh) - (Nylon-200)	-0.217283	0.449	-0.484	1
	(Control-Fresh) - (Nylon-50)	-0.315932	0.451	-0.701	1
	(Control-Fresh) - (PP-100)	-0.119557	0.464	-0.257	1
	(Control-Fresh) - (PP-200)	-0.172126	0.464	-0.371	1
	(Control-Fresh) - (PP-50)	-0.398755	0.455	-0.877	0.9998
	(Control-Leachate) - (HDPE-100)	-0.179249	0.428	-0.418	1
	(Control-Leachate) - (HDPE-200)	0.262798	0.454	0.579	1
	(Control-Leachate) - (HDPE-50)	0.004753	0.437	0.011	1
	(Control-Leachate) - (LDPE-100)	-0.067161	0.43	-0.156	1
	(Control-Leachate) - (LDPE-200)	0.041742	0.434	0.096	1
	(Control-Leachate) - (LDPE-50)	0.006451	0.446	0.014	1
	(Control-Leachate) - (Nylon-100)	0.154479	0.446	0.346	1
	(Control-Leachate) - (Nylon-200)	0.042923	0.432	0.099	1
	(Control-Leachate) - (Nylon-50)	-0.055726	0.435	-0.128	1
	(Control-Leachate) - (PP-100)	0.140649	0.449	0.313	1
	(Control-Leachate) - (PP-200)	0.08808	0.448	0.196	1
	(Control-Leachate) - (PP-50)	-0.13855	0.438	-0.316	1
	(HDPE-100) - (HDPE-200)	0.442047	0.442	1	0.9993
	(HDPE-100) - (HDPE-50)	0.184002	0.424	0.434	1
	(HDPE-100) - (LDPE-100)	0.112089	0.416	0.269	1
	(HDPE-100) - (Nylon-100)	0.333728	0.434	0.77	1
	(HDPE-100) - (PP-100)	0.319898	0.437	0.733	1
	(HDPE-200) - (HDPE-50)	-0.258045	0.45	-0.573	1
	(HDPE-200) - (LDPE-200)	-0.221055	0.448	-0.494	1
	(HDPE-200) - (Nylon-200)	-0.219875	0.446	-0.493	1
	(HDPE-200) - (PP-200)	-0.174718	0.461	-0.379	1
	(HDPE-50) - (LDPE-50)	0.001698	0.442	0.004	1
	(HDPE-50) - (Nylon-50)	-0.060479	0.431	-0.14	1
	(HDPE-50) - (PP-50)	-0.143303	0.435	-0.33	1
	(LDPE-100) - (LDPE-200)	0.108903	0.423	0.258	1
	(LDPE-100) - (LDPE-50)	0.073612	0.435	0.169	1
	(LDPE-100) - (Nylon-100)	0.221639	0.435	0.51	1
	(LDPE-100) - (PP-100)	0.207809	0.438	0.475	1
	(LDPE-200) - (LDPE-50)	-0.035291	0.44	-0.08	1
	(LDPE-200) - (Nylon-200)	0.00118	0.426	0.003	1
	(LDPE-200) - (PP-200)	0.046338	0.442	0.105	1
	(LDPE-50) - (Nylon-50)	-0.062177	0.44	-0.141	1
	(LDPE-50) - (PP-50)	-0.145001	0.444	-0.327	1
	(Nylon-100) - (Nylon-200)	-0.111556	0.438	-0.255	1
	(Nylon-100) - (Nylon-50)	-0.210205	0.44	-0.478	1
	(Nylon-100) - (PP-100)	-0.01383	0.454	-0.03	1
	(Nylon-200) - (Nylon-50)	-0.098649	0.426	-0.232	1
	(Nylon-200) - (PP-200)	0.045157	0.44	0.103	1
	(Nylon-50) - (PP-50)	-0.082823	0.432	-0.192	1
	(PP-100) - (PP-200)	-0.052569	0.456	-0.115	1
	(PP-100) - (PP-50)	-0.279198	0.447	-0.625	1
	(PP-200) - (PP-50)	-0.22663	0.446	-0.508	1
3	(Control-Fresh) - (Control-Leachate)	-0.081852	0.338	-0.242	1
	(Control-Fresh) - (HDPE-100)	0.118611	0.328	0.362	1
	(Control-Fresh) - (HDPE-200)	-0.142937	0.321	-0.446	1
	(Control-Fresh) - (HDPE-50)	-0.311912	0.328	-0.952	0.9996
	(Control-Fresh) - (LDPE-100)	0.127435	0.324	0.394	1
	(Control-Fresh) - (LDPE-200)	0.299669	0.324	0.925	0.9997
	(Control-Fresh) - (LDPE-50)	-0.027257	0.33	-0.083	1
	(Control-Fresh) - (Nylon-100)	0.005777	0.33	0.018	1
	(Control-Fresh) - (Nylon-200)	0.262856	0.341	0.77	1
	(Control-Fresh) - (Nylon-50)	0.263004	0.333	0.789	1
	(Control-Fresh) - (PP-100)	-0.066338	0.324	-0.205	1
	(Control-Fresh) - (PP-200)	-0.117869	0.324	-0.364	1
	(Control-Fresh) - (PP-50)	-0.308166	0.328	-0.939	0.9997
	(Control-Leachate) - (HDPE-100)	0.200463	0.341	0.587	1
	(Control-Leachate) - (HDPE-200)	-0.061084	0.335	-0.182	1
	(Control-Leachate) - (HDPE-50)	-0.23006	0.341	-0.674	1
	(Control-Leachate) - (LDPE-100)	0.209287	0.338	0.62	1
	(Control-Leachate) - (LDPE-200)	0.381521	0.338	1.128	0.9977
	(Control-Leachate) - (LDPE-50)	0.054596	0.344	0.159	1
	(Control-Leachate) - (Nylon-100)	0.087629	0.343	0.255	1
	(Control-Leachate) - (Nylon-200)	0.344708	0.355	0.972	0.9995
	(Control-Leachate) - (Nylon-50)	0.344857	0.347	0.994	0.9994
	(Control-Leachate) - (PP-100)	0.015514	0.338	0.046	1
	(Control-Leachate) - (PP-200)	-0.036016	0.338	-0.107	1
	(Control-Leachate) - (PP-50)	-0.226314	0.342	-0.662	1
	(HDPE-100) - (HDPE-200)	-0.261547	0.324	-0.806	0.9999
	(HDPE-100) - (HDPE-50)	-0.430523	0.331	-1.3	0.9908
	(HDPE-100) - (LDPE-100)	0.008825	0.327	0.027	1
	(HDPE-100) - (Nylon-100)	-0.112834	0.333	-0.339	1
	(HDPE-100) - (PP-100)	-0.184949	0.328	-0.564	1
	(HDPE-200) - (HDPE-50)	-0.168975	0.324	-0.521	1
	(HDPE-200) - (LDPE-200)	0.442605	0.321	1.379	0.9843
	(HDPE-200) - (Nylon-200)	0.405793	0.338	1.199	0.9958
	(HDPE-200) - (PP-200)	0.025068	0.321	0.078	1
	(HDPE-50) - (LDPE-50)	0.284656	0.334	0.853	0.9999
	(HDPE-50) - (Nylon-50)	0.574917	0.337	1.707	0.9141
	(HDPE-50) - (PP-50)	0.003746	0.331	0.011	1
	(LDPE-100) - (LDPE-200)	0.172234	0.323	0.533	1
	(LDPE-100) - (LDPE-50)	-0.154692	0.33	-0.469	1
	(LDPE-100) - (Nylon-100)	-0.121659	0.329	-0.37	1
	(LDPE-100) - (PP-100)	-0.193773	0.324	-0.599	1
	(LDPE-100) - (PP-200)	-0.245304	0.324	-0.758	1
	(LDPE-200) - (LDPE-50)	-0.326925	0.33	-0.99	0.9994
	(LDPE-200) - (Nylon-200)	-0.036812	0.341	-0.108	1
	(LDPE-200) - (PP-200)	-0.417537	0.324	-1.288	0.9916
	(LDPE-50) - (Nylon-50)	0.290261	0.339	0.856	0.9999
	(LDPE-50) - (PP-50)	-0.280909	0.334	-0.84	0.9999
	(Nylon-100) - (Nylon-200)	0.25708	0.347	0.742	1
	(Nylon-100) - (Nylon-50)	0.257228	0.339	0.76	1
	(Nylon-100) - (PP-100)	-0.072115	0.33	-0.219	1
	(Nylon-200) - (Nylon-50)	0.000148	0.35	0	1
	(Nylon-200) - (PP-200)	-0.380725	0.342	-1.115	0.9979
	(Nylon-50) - (PP-50)	-0.57117	0.337	-1.693	0.919
	(PP-100) - (PP-200)	-0.05153	0.324	-0.159	1
	(PP-100) - (PP-50)	-0.241828	0.328	-0.737	1
	(PP-200) - (PP-50)	-0.190297	0.328	-0.58	1
5	(Control-Fresh) - (Control-Leachate)	0.096501	0.472	0.204	1
	(Control-Fresh) - (HDPE-100)	0.676676	0.415	1.631	0.9383
	(Control-Fresh) - (HDPE-200)	-0.288465	0.387	-0.746	1
	(Control-Fresh) - (HDPE-50)	-0.368372	0.428	-0.86	0.9999
	(Control-Fresh) - (LDPE-100)	0.582237	0.401	1.452	0.9756
	(Control-Fresh) - (LDPE-200)	0.817801	0.405	2.018	0.7566
	(Control-Fresh) - (LDPE-50)	0.199241	0.443	0.45	1
	(Control-Fresh) - (Nylon-100)	0.11728	0.441	0.266	1
	(Control-Fresh) - (Nylon-200)	0.742995	0.471	1.576	0.9525
	(Control-Fresh) - (Nylon-50)	0.841941	0.443	1.9	0.8272
	(Control-Fresh) - (PP-100)	-0.013119	0.411	-0.032	1
	(Control-Fresh) - (PP-200)	-0.063611	0.411	-0.155	1
	(Control-Fresh) - (PP-50)	-0.217577	0.428	-0.509	1
	(Control-Leachate) - (HDPE-100)	0.580175	0.474	1.224	0.9948
	(Control-Leachate) - (HDPE-200)	-0.384966	0.451	-0.854	0.9999
	(Control-Leachate) - (HDPE-50)	-0.464873	0.487	-0.955	0.9996
	(Control-Leachate) - (LDPE-100)	0.485736	0.462	1.051	0.9989
	(Control-Leachate) - (LDPE-200)	0.7213	0.466	1.549	0.9585
	(Control-Leachate) - (LDPE-50)	0.10274	0.499	0.206	1
	(Control-Leachate) - (Nylon-100)	0.020779	0.497	0.042	1
	(Control-Leachate) - (Nylon-200)	0.646494	0.524	1.233	0.9944
	(Control-Leachate) - (Nylon-50)	0.74544	0.499	1.494	0.9691
	(Control-Leachate) - (PP-100)	-0.10962	0.471	-0.233	1
	(Control-Leachate) - (PP-200)	-0.160112	0.472	-0.339	1
	(Control-Leachate) - (PP-50)	-0.314077	0.486	-0.646	1
	(HDPE-100) - (HDPE-200)	-0.965142	0.391	-2.468	0.4303
	(HDPE-100) - (HDPE-50)	-1.04505	0.432	-2.42	0.4653
	(HDPE-100) - (LDPE-100)	-0.09444	0.402	-0.235	1
	(HDPE-100) - (Nylon-100)	-0.559396	0.443	-1.263	0.993
	(HDPE-100) - (PP-100)	-0.689795	0.414	-1.667	0.9275
	(HDPE-200) - (HDPE-50)	-0.079906	0.404	-0.198	1
	(HDPE-200) - (LDPE-200)	1.10627	0.381	2.906	0.1749
	(HDPE-200) - (Nylon-200)	1.03146	0.451	2.289	0.563
	(HDPE-200) - (PP-200)	0.224854	0.386	0.582	1
	(HDPE-50) - (LDPE-50)	0.567613	0.459	1.238	0.9942
	(HDPE-50) - (Nylon-50)	1.21031	0.459	2.636	0.3169
	(HDPE-50) - (PP-50)	0.150795	0.444	0.34	1
	(LDPE-100) - (LDPE-200)	0.235564	0.391	0.602	1
	(LDPE-100) - (LDPE-50)	-0.382995	0.432	-0.886	0.9998
	(LDPE-100) - (Nylon-100)	-0.464957	0.43	-1.081	0.9985
	(LDPE-100) - (PP-100)	-0.595356	0.4	-1.489	0.9699
	(LDPE-200) - (LDPE-50)	-0.61856	0.436	-1.42	0.9799
	(LDPE-200) - (Nylon-200)	-0.074805	0.463	-0.162	1
	(LDPE-200) - (PP-200)	-0.881412	0.404	-2.179	0.6449
	(LDPE-50) - (Nylon-50)	0.642699	0.471	1.364	0.9858
	(LDPE-50) - (PP-50)	-0.416818	0.458	-0.911	0.9998
	(Nylon-100) - (Nylon-200)	0.625715	0.496	1.261	0.9931
	(Nylon-100) - (Nylon-50)	0.724661	0.469	1.544	0.9596
	(Nylon-100) - (PP-100)	-0.130399	0.44	-0.297	1
	(Nylon-200) - (Nylon-50)	0.098946	0.496	0.199	1
	(Nylon-200) - (PP-200)	-0.806607	0.471	-1.713	0.9118
	(Nylon-50) - (PP-50)	-1.05952	0.458	-2.314	0.5443
	(PP-100) - (PP-200)	-0.050492	0.41	-0.123	1
	(PP-100) - (PP-50)	-0.204457	0.427	-0.479	1
	(PP-200) - (PP-50)	-0.153965	0.427	-0.361	1
7	(Control-Fresh) - (Control-Leachate)	0.274854	0.731	0.376	1
	(Control-Fresh) - (HDPE-100)	1.23474	0.627	1.97	0.7866
	(Control-Fresh) - (HDPE-200)	-0.433994	0.6	-0.723	1
	(Control-Fresh) - (HDPE-50)	-0.424831	0.659	-0.645	1
	(Control-Fresh) - (LDPE-100)	1.03704	0.606	1.71	0.9128
	(Control-Fresh) - (LDPE-200)	1.33593	0.617	2.165	0.6549
	(Control-Fresh) - (LDPE-50)	0.425739	0.689	0.618	1
	(Control-Fresh) - (Nylon-100)	0.228784	0.685	0.334	1
	(Control-Fresh) - (Nylon-200)	1.22313	0.72	1.699	0.917
	(Control-Fresh) - (Nylon-50)	1.42088	0.678	2.096	0.7045
	(Control-Fresh) - (PP-100)	0.0401	0.638	0.063	1
	(Control-Fresh) - (PP-200)	-0.009354	0.638	-0.015	1
	(Control-Fresh) - (PP-50)	-0.126987	0.657	-0.193	1
	(Control-Leachate) - (HDPE-100)	0.959888	0.713	1.346	0.9874
	(Control-Leachate) - (HDPE-200)	-0.708848	0.693	-1.023	0.9992
	(Control-Leachate) - (HDPE-50)	-0.699685	0.744	-0.941	0.9997
	(Control-Leachate) - (LDPE-100)	0.762184	0.695	1.096	0.9983
	(Control-Leachate) - (LDPE-200)	1.06108	0.704	1.506	0.9668
	(Control-Leachate) - (LDPE-50)	0.150885	0.77	0.196	1
	(Control-Leachate) - (Nylon-100)	-0.046071	0.767	-0.06	1
	(Control-Leachate) - (Nylon-200)	0.94828	0.796	1.191	0.996
	(Control-Leachate) - (Nylon-50)	1.14602	0.758	1.511	0.9659
	(Control-Leachate) - (PP-100)	-0.234754	0.725	-0.324	1
	(Control-Leachate) - (PP-200)	-0.284208	0.725	-0.392	1
	(Control-Leachate) - (PP-50)	-0.401841	0.742	-0.542	1
	(HDPE-100) - (HDPE-200)	-1.66874	0.582	-2.868	0.1913
	(HDPE-100) - (HDPE-50)	-1.65957	0.641	-2.59	0.3463
	(HDPE-100) - (LDPE-100)	-0.197704	0.58	-0.341	1
	(HDPE-100) - (Nylon-100)	-1.00596	0.666	-1.51	0.9662
	(HDPE-100) - (PP-100)	-1.19464	0.618	-1.933	0.8088
	(HDPE-200) - (HDPE-50)	0.009163	0.615	0.015	1
	(HDPE-200) - (LDPE-200)	1.76993	0.571	3.099	0.106
	(HDPE-200) - (Nylon-200)	1.65713	0.681	2.432	0.4564
	(HDPE-200) - (PP-200)	0.42464	0.593	0.716	1
	(HDPE-50) - (LDPE-50)	0.85057	0.702	1.212	0.9953
	(HDPE-50) - (Nylon-50)	1.84571	0.691	2.672	0.2952
	(HDPE-50) - (PP-50)	0.297844	0.671	0.444	1
	(LDPE-100) - (LDPE-200)	0.298895	0.569	0.525	1
	(LDPE-100) - (LDPE-50)	-0.611299	0.65	-0.94	0.9997
	(LDPE-100) - (Nylon-100)	-0.808255	0.647	-1.249	0.9937
	(LDPE-100) - (PP-100)	-0.996938	0.598	-1.668	0.927
	(LDPE-200) - (LDPE-50)	-0.910194	0.66	-1.379	0.9844
	(LDPE-200) - (Nylon-200)	-0.112798	0.689	-0.164	1
	(LDPE-200) - (PP-200)	-1.34529	0.609	-2.209	0.6226
	(LDPE-50) - (Nylon-50)	0.995138	0.717	1.387	0.9835
	(LDPE-50) - (PP-50)	-0.552726	0.7	-0.79	1
	(Nylon-100) - (Nylon-200)	0.994351	0.755	1.317	0.9896
	(Nylon-100) - (Nylon-50)	1.19209	0.715	1.668	0.9271
	(Nylon-100) - (PP-100)	-0.188683	0.678	-0.278	1
	(Nylon-200) - (Nylon-50)	0.197743	0.744	0.266	1
	(Nylon-200) - (PP-200)	-1.23249	0.713	-1.728	0.9063
	(Nylon-50) - (PP-50)	-1.54786	0.688	-2.249	0.5935
	(PP-100) - (PP-200)	-0.049454	0.631	-0.078	1
	(PP-100) - (PP-50)	-0.167087	0.65	-0.257	1
	(PP-200) - (PP-50)	-0.117633	0.65	-0.181	1

## Sheet: Table S6a
Comparison	Estimate	Std. Error	z value	p-value
(Intercept)	-1.93286	0.266753	-7.246	4.3e-13
Control-Leachate	-0.078574	0.420313	-0.187	0.85171
HDPE-100	-0.059807	0.412556	-0.145	0.88474
HDPE-200	0.030061	0.408625	0.074	0.94136
HDPE-50	0.180658	0.430945	0.419	0.67506
LDPE-100	-0.003208	0.423612	-0.008	0.99396
LDPE-200	0.223283	0.407425	0.548	0.58367
LDPE-50	-0.243603	0.435459	-0.559	0.57588
Nylon-100	-0.133103	0.40917	-0.325	0.74495
Nylon-200	-0.156167	0.37966	-0.411	0.68083
Nylon-50	-0.151546	0.367219	-0.413	0.67984
PP-100	-0.231783	0.39414	-0.588	0.55648
PP-200	-0.069531	0.422272	-0.165	0.86921
PP-50	-0.265276	0.399316	-0.664	0.50648
Day	0.22872	0.067859	3.371	0.00075
Control-Leachate : Day	0.09581	0.107399	0.892	0.37234
HDPE-100 : Day	-0.181275	0.107839	-1.681	0.09277
HDPE-200 : Day	-0.09589	0.103086	-0.93	0.35227
HDPE-50 : Day	-0.064575	0.112017	-0.576	0.56429
LDPE-100 : Day	-0.02574	0.110179	-0.234	0.81528
LDPE-200 : Day	-0.11631	0.10405	-1.118	0.26364
LDPE-50 : Day	0.036334	0.11169	0.325	0.74494
Nylon-100 : Day	-0.153113	0.10455	-1.465	0.14306
Nylon-200 : Day	-0.120475	0.096283	-1.251	0.21084
Nylon-50 : Day	0.054823	0.094551	0.58	0.56203
PP-100 : Day	-0.043245	0.102764	-0.421	0.67389
PP-200 : Day	0.059222	0.114423	0.518	0.60475
PP-50 : Day	0.163809	0.101943	1.607	0.10808

[truncated: 3 more sheets: Table S6b, Table S7a, Table S7b]
